# Supplementary material
Source: publisher figshare collection journal article supplement (https://acs.figshare.com/ndownloader/files/8731018)
Supplement: Supplementary file 1 [file 8731018]

# **N-Alkylated 1,4-Diazabicyclo[2.2.2]octane–Polyethylene Glycol Melt as Deep Eutectic Solvent for the Synthesis of Fisher Indoles and 1*H*-Tetrazoles**

Sarfraz Ali Ghumro,<sup>a</sup> Rima D. Alharthy,<sup>b</sup> Mariya al-Rashida,<sup>c</sup> Shakil Ahmed,<sup>a</sup> Muhammad Imran Malik,<sup>\*a</sup> and Abdul Hameed<sup>\*a</sup>

<sup>a</sup>H.E.J. Research Institute of Chemistry, International Center for Chemical and Biological Sciences, University of Karachi, Karachi-75270, Pakistan

<sup>b</sup>Department of Chemistry, Science and Arts College, Rabigh Campus, King Abdulaziz University, Jeddah, Saudi Arabia.

<sup>c</sup>Department of Chemistry, Forman Christian College (A Chartered University), Ferozepur Road, Lahore-54600, Pakistan.

---

M. I. Malik; [mimran.malik@iccs.edu](mailto:mimran.malik@iccs.edu)

A. Hameed Tel.: 0092-21-99261701-2; Fax: 0092-21-3481901;  
[abdul.hameed@iccs.edu](mailto:abdul.hameed@iccs.edu) / [abdul\\_hameed8@hotmail.com](mailto:abdul_hameed8@hotmail.com)

### Thermal Study of DABCO-ILs (2, 4)

Figure-S1a shows overlap of thermogravimetric (TGA) graph and its first derivative (DTG) for compound **2**, and Figure-S1b shows overlap of TGA and DSC graphs. The compound remains stable on heating up to 200 °C. In the first step there is only a slight loss in weight of about 16% in the short temperature range of 200-220 °C. As can be seen from the DSC graph, this is an endothermic process and is probably due to the loss of water molecules. In the second step, also an endothermic process, there is a weight loss of 24% in the temperature range 220-260 °C, most likely due to loss of alkyl chain. From the DTG, the loss of water molecules is observed at 215 °C, and the first decomposition temperature is calculated to be 235 °C. The remaining weight loss (about 40%) occurs in the third and last gradual step in the temperature range 280-360 °C, the second decomposition temperature calculated from DTG is 315 °C.

Figure-S1c shows overlap of thermogravimetric (TGA) graph and its first derivative (DTG) for compound **4**, and Figure-S1d shows the overlap of TGA and DSC graphs. In the first step there is a weight loss of about 30% in the temperature range from ambient to 100 °C, the corresponding DSC data in this range suggests an endothermic process associated with this change. This weight loss is most likely due to loss of water molecules. After initial loss of water, the weight remains stable at heating up to 215 °C, after which a sharp decrease in weight (28%) is observed, this is the first decomposition temperature at 255 °C as indicated by the DTG. According to DSC, this weight loss is also an endothermic process and is probably due to loss of alkyl chains. Immediately after this step, a sharp weight loss of about 40% is observed. This corresponds to a second decomposition temperature of 300 °C as indicated by the DTG. Similar to previous step, this was also an endothermic process as can be seen from the DSC graph.

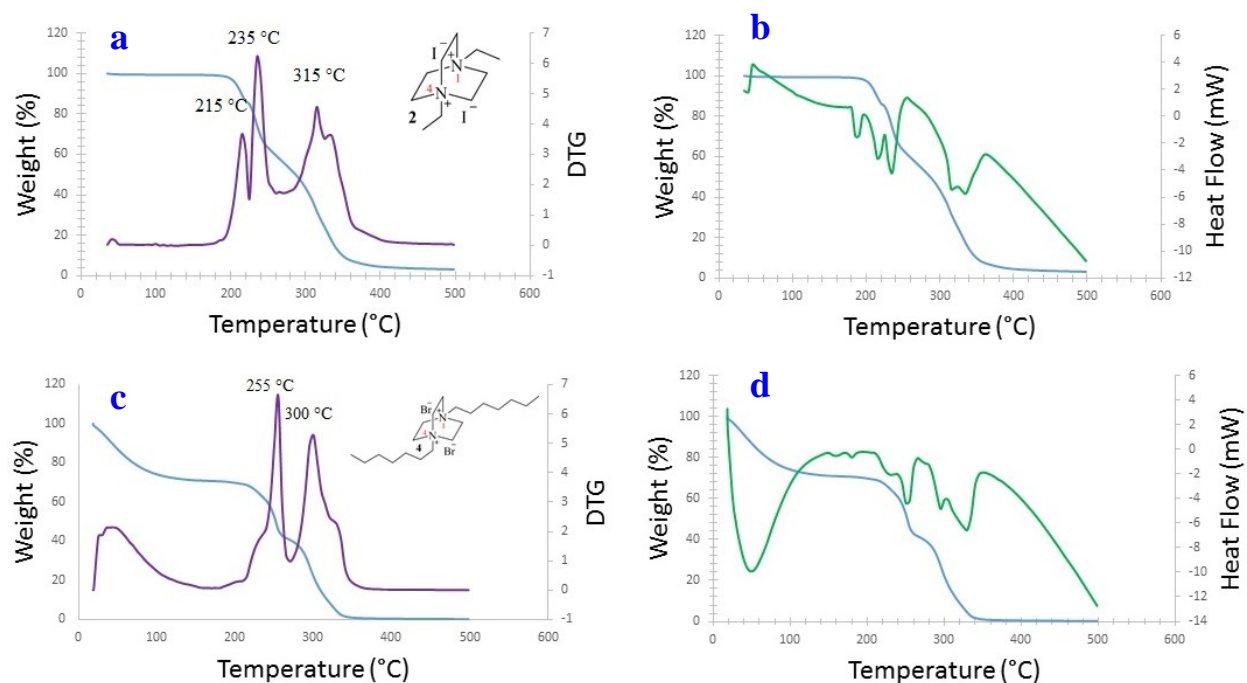

**Figure-S1:** a) Overlap of TGA (blue) and DTG (purple) graphs for compound **2**; b) Overlap of TGA (blue) and DSC (green) graphs for compound **2**; c) Overlap of TGA (blue) and DTG (purple) graphs for compound **4**; d) Overlap of TGA (blue) and DSC (green) graphs for compound **4**.

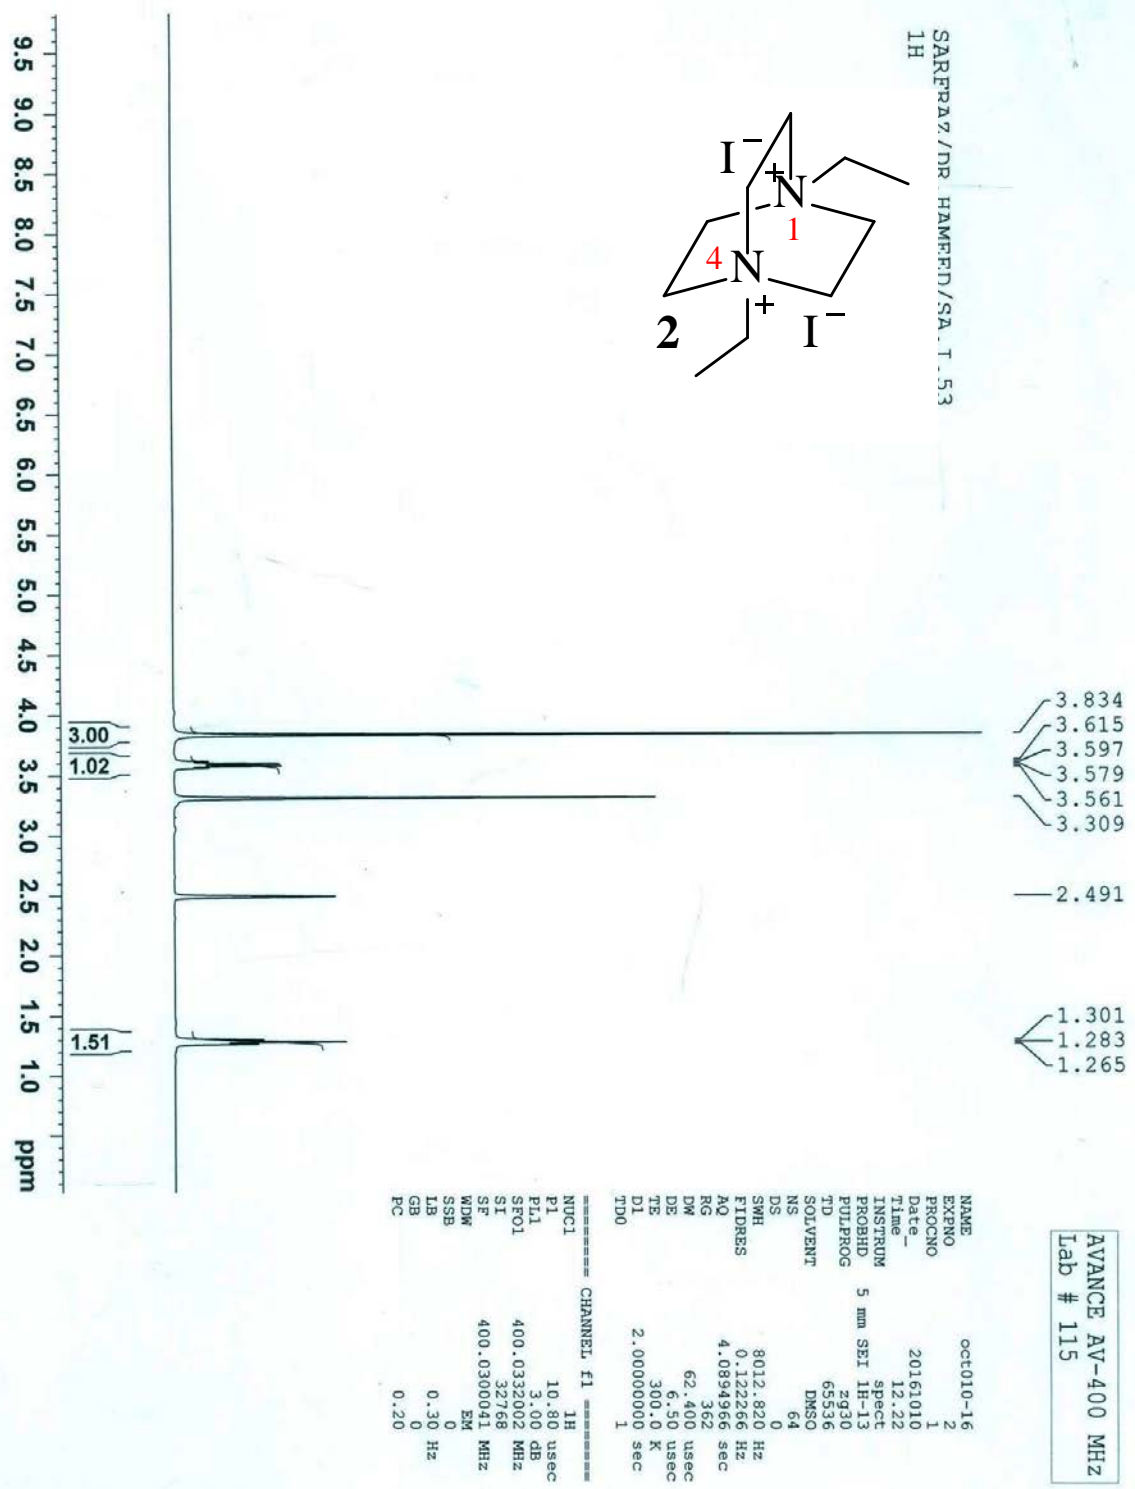

Figure-S2

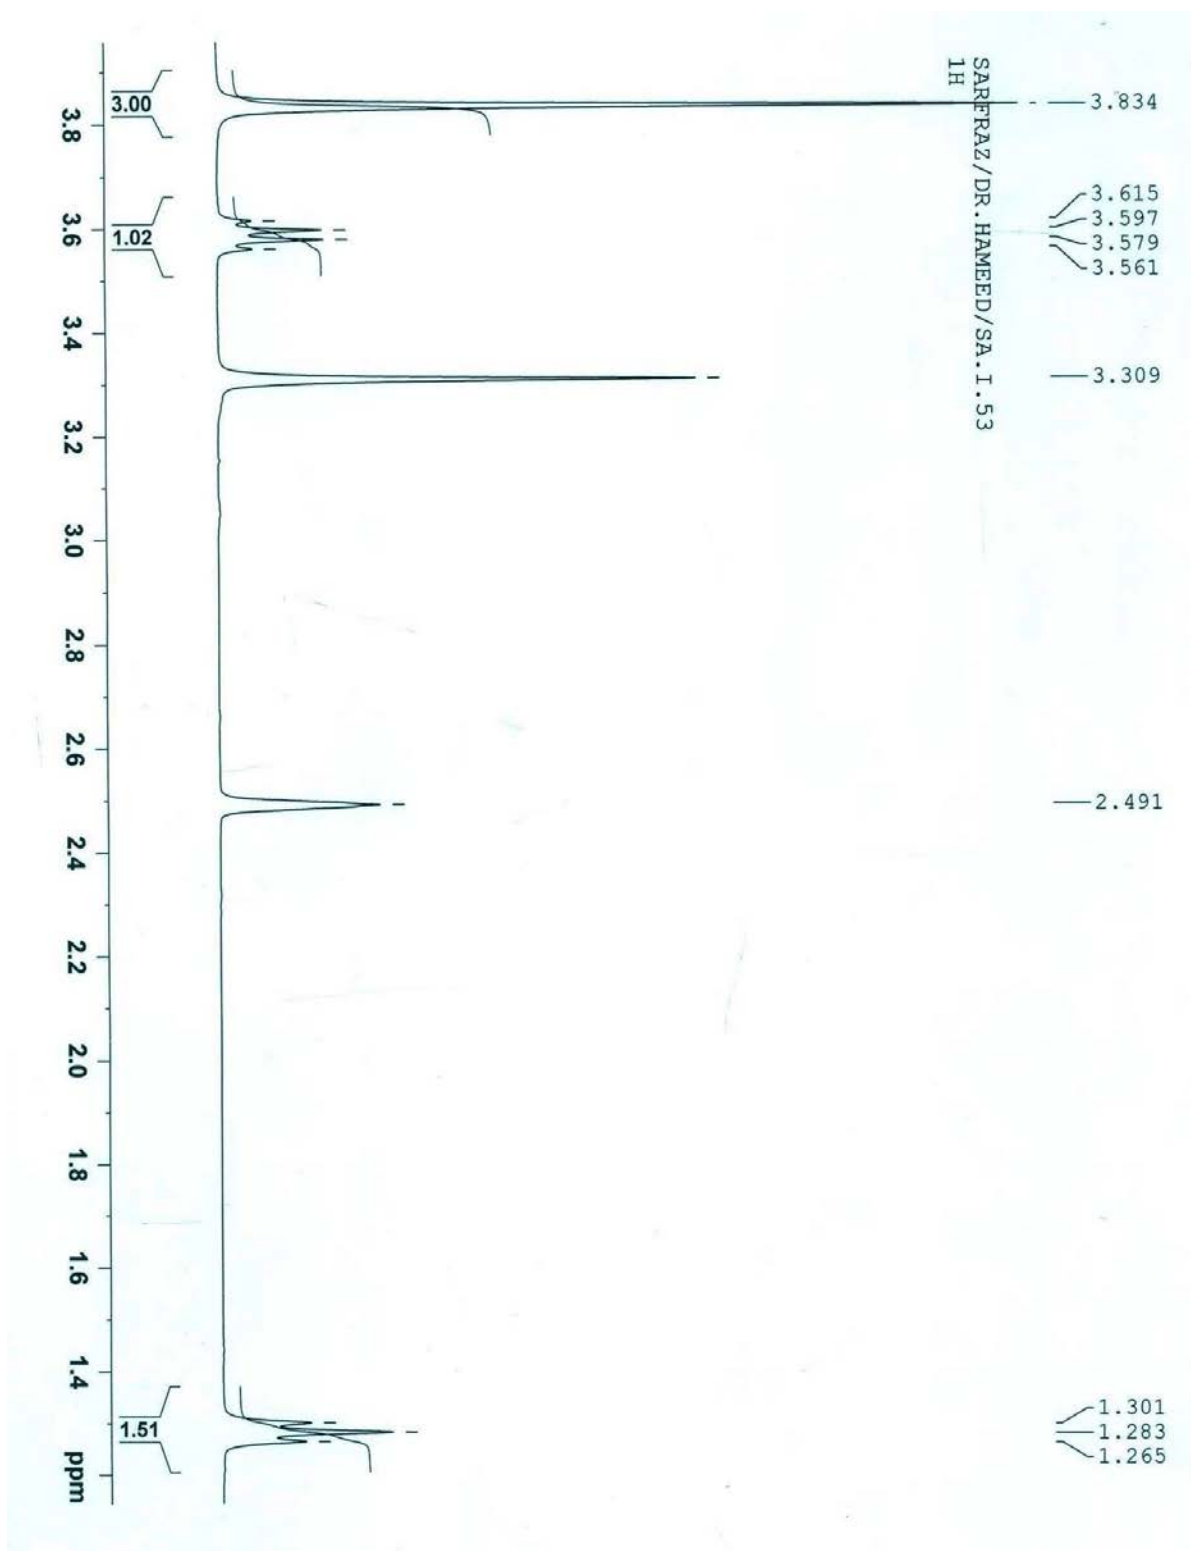

Figure-S2a

Sarfraz / Dr. A.Hameed / SA-I-53 / DMSO  
BB

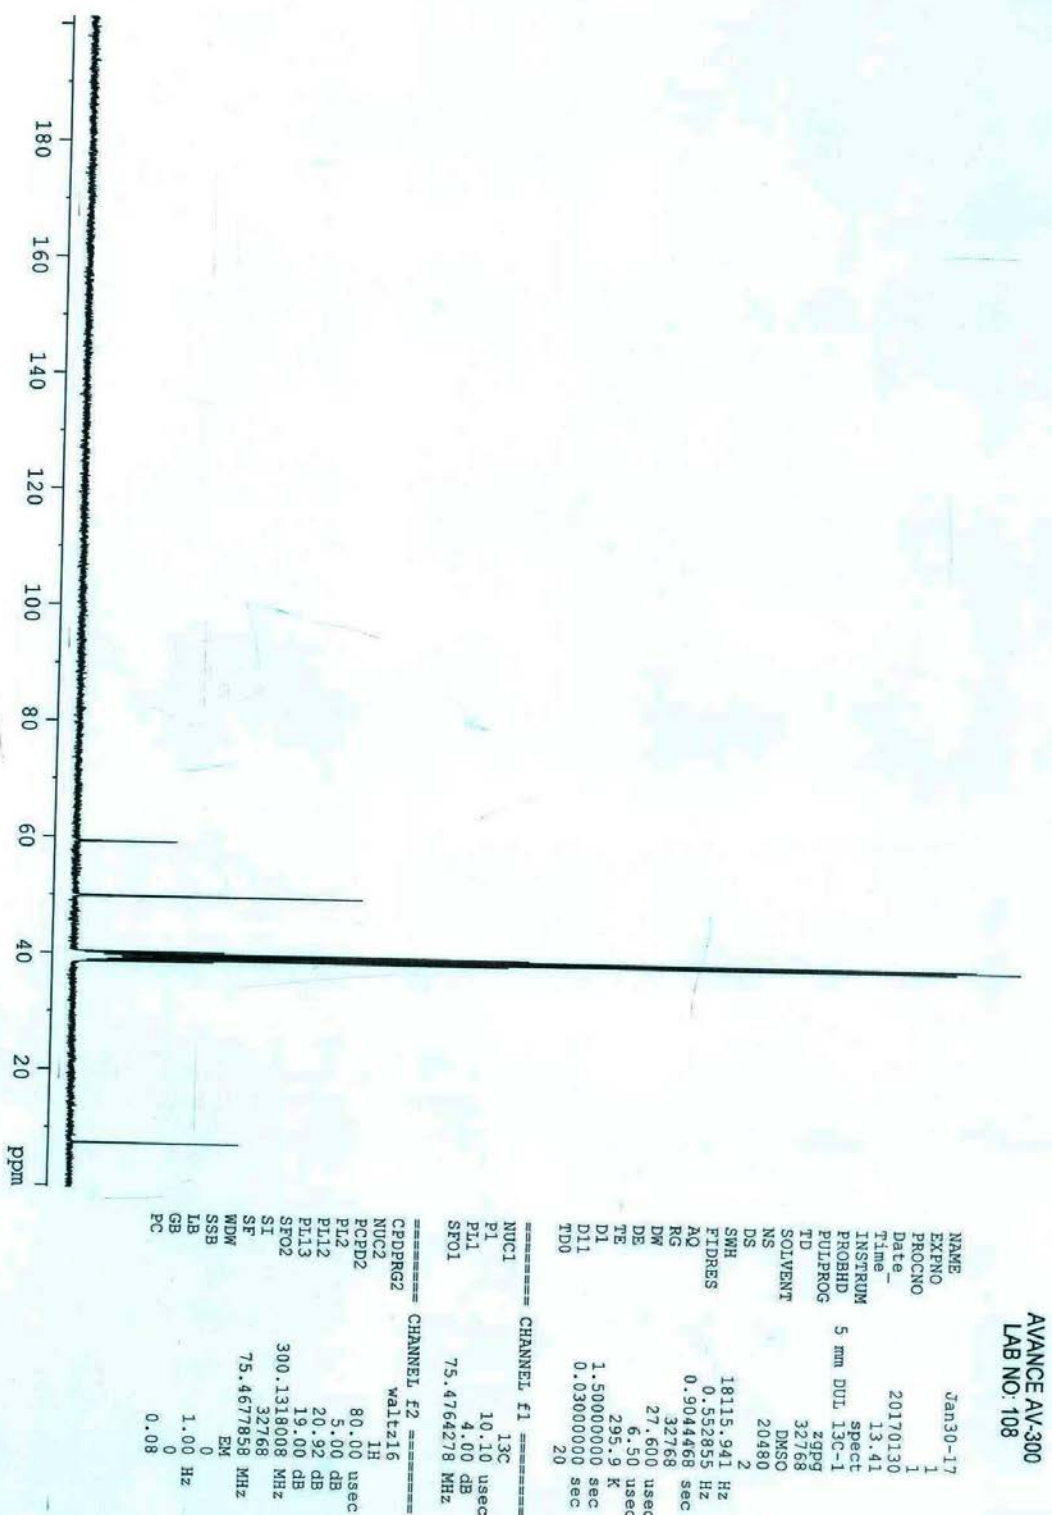

Figure-S3

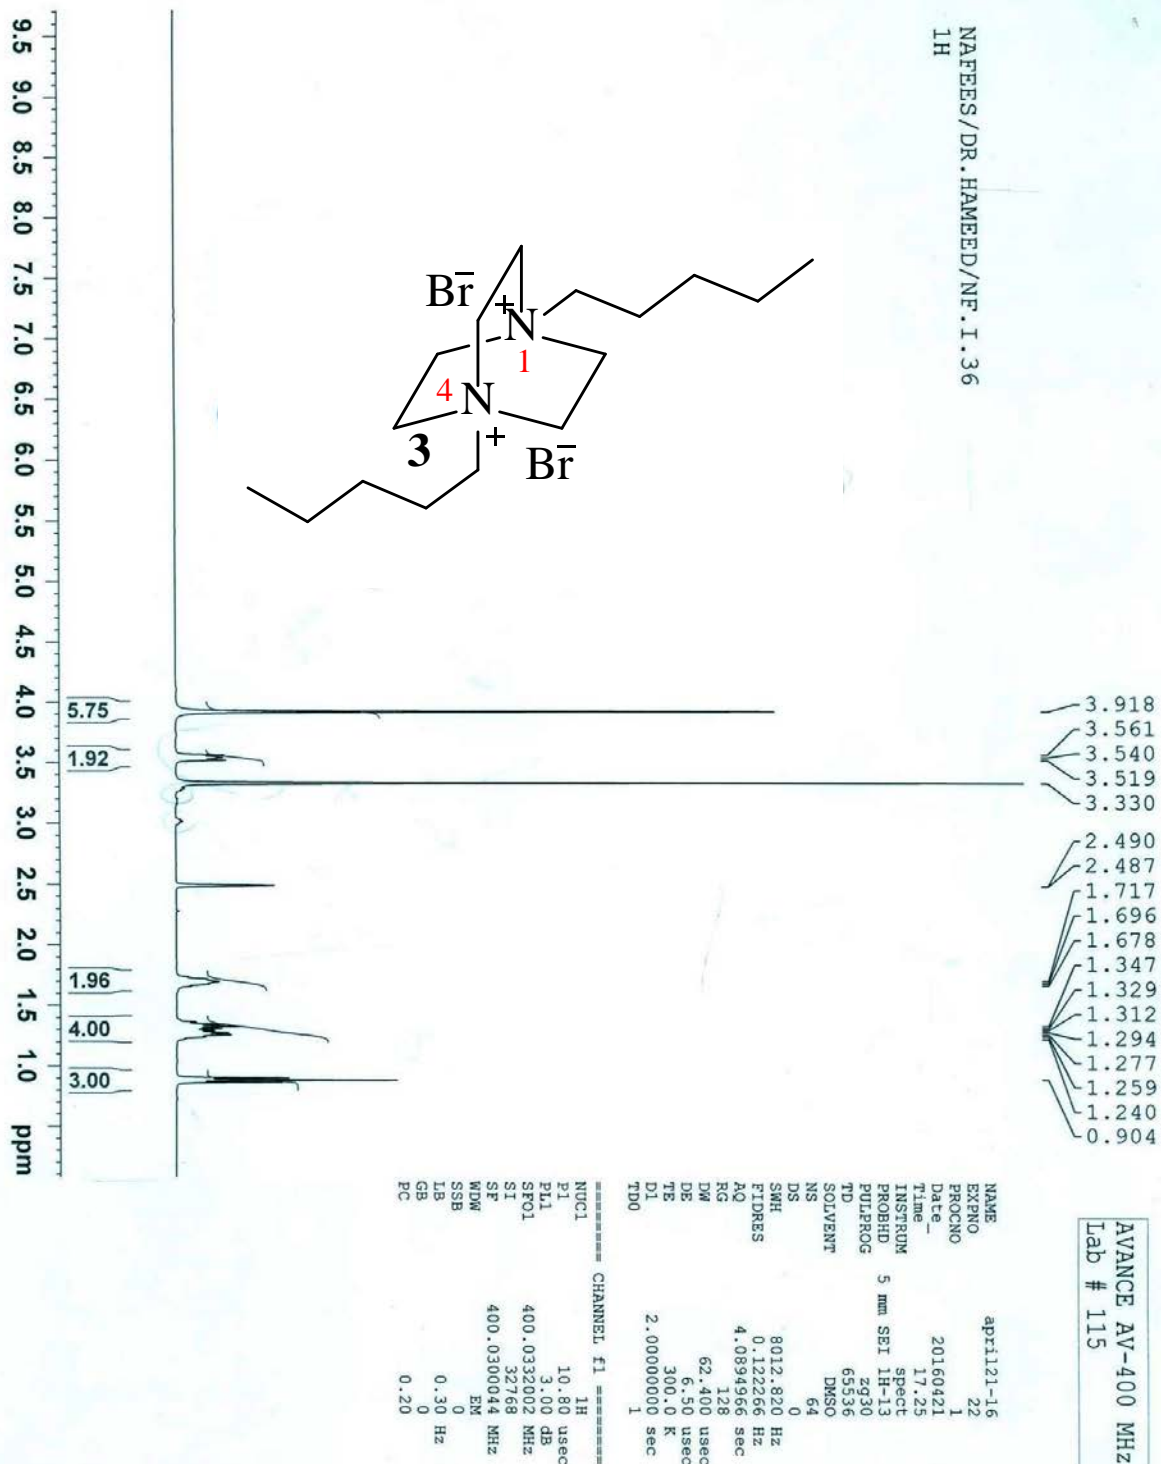

Figure-S4

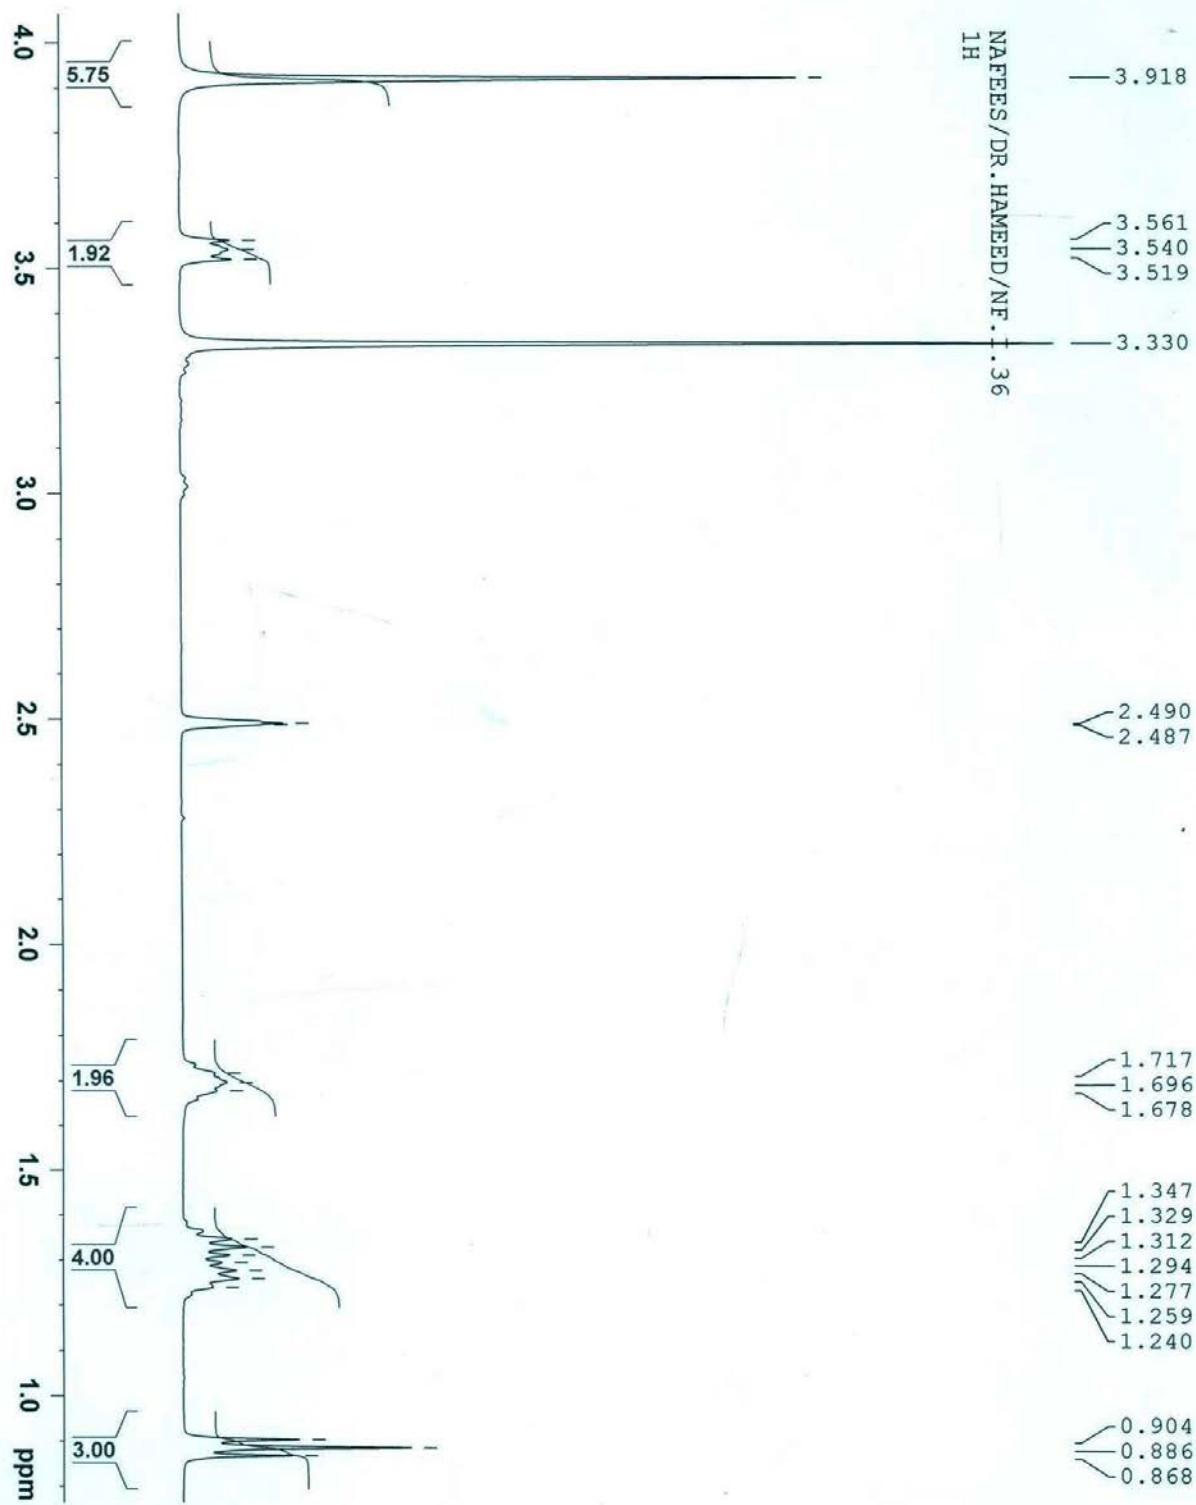

Figure-S4a



SARFARAZ/DR, ABDUL HAMEED/SA-I-32b/  
ICCBS, U.O.K/BB

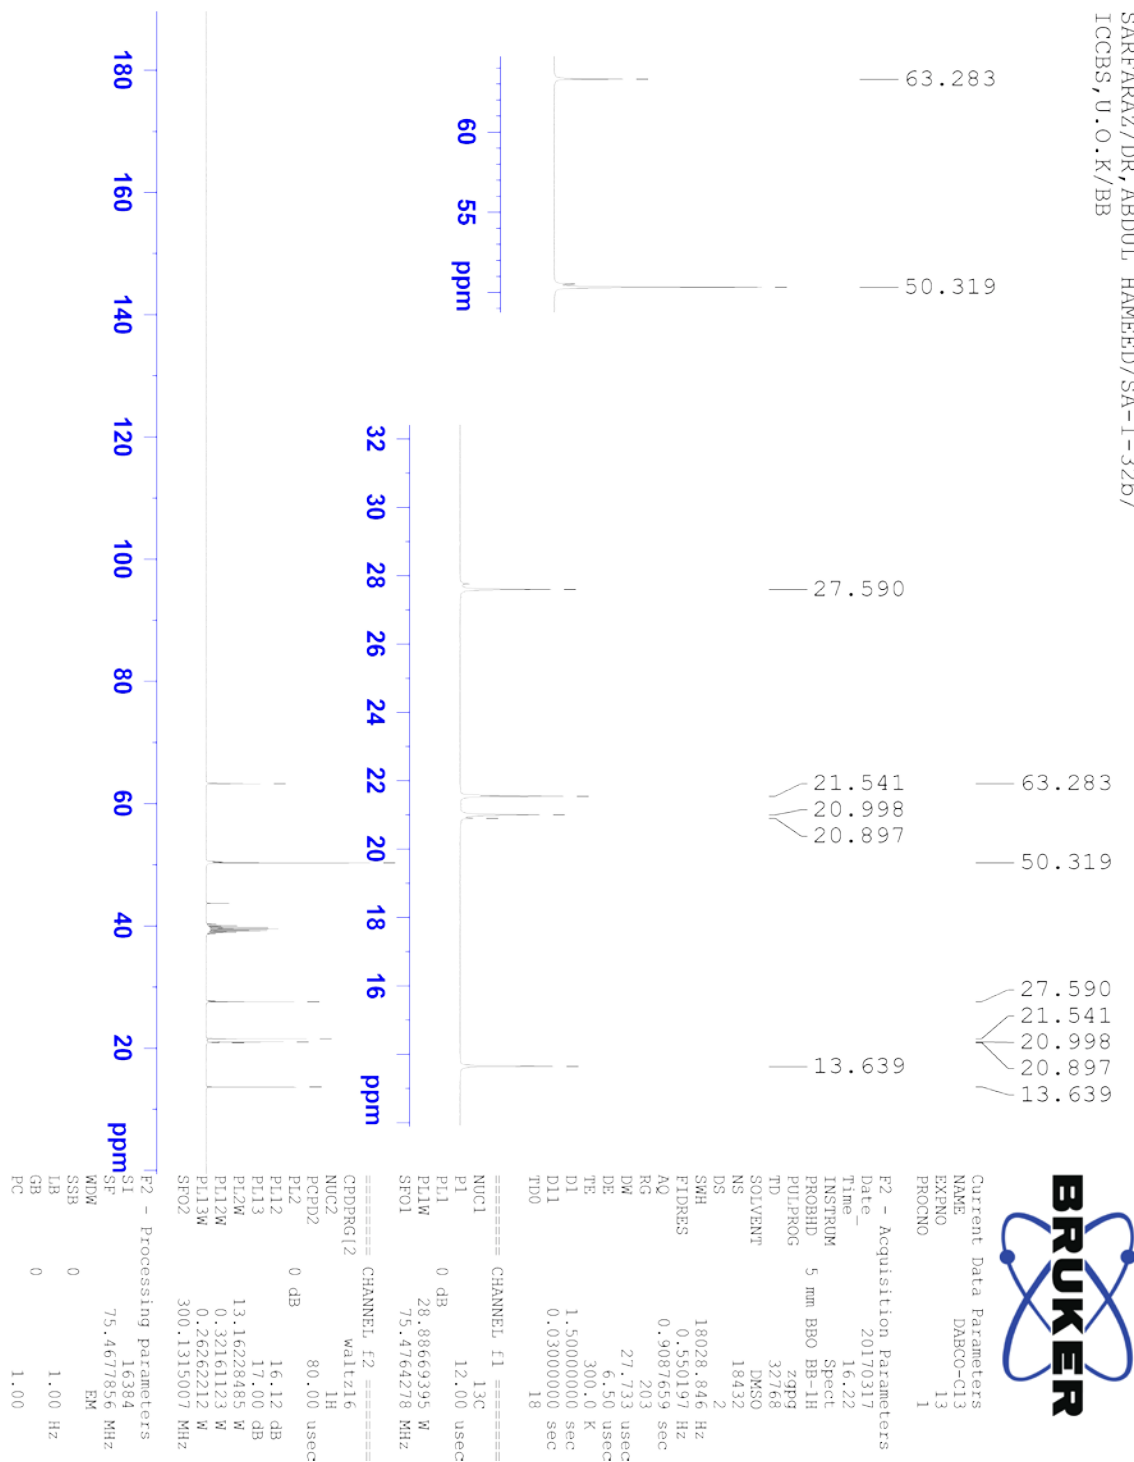

Figure-S5

SARFARAZ/DR, ABDUL HAMEED/SA-I-51B/  
ICCBS, U.O.K/1H

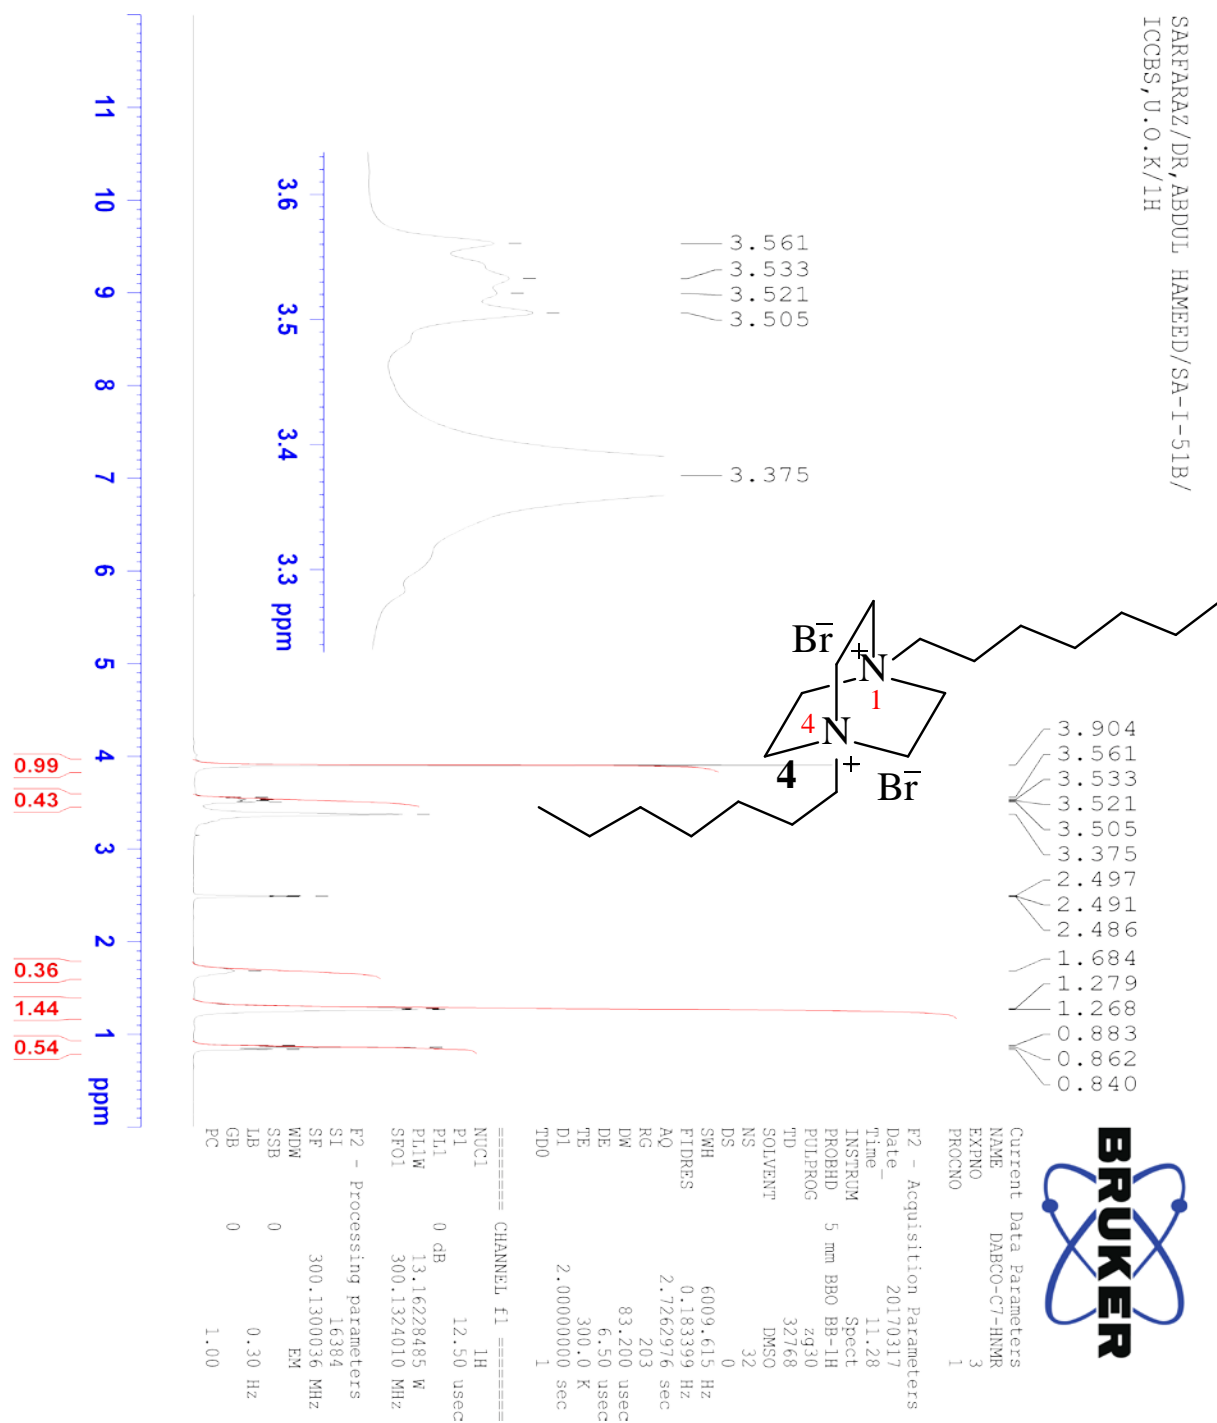

Figure-S6

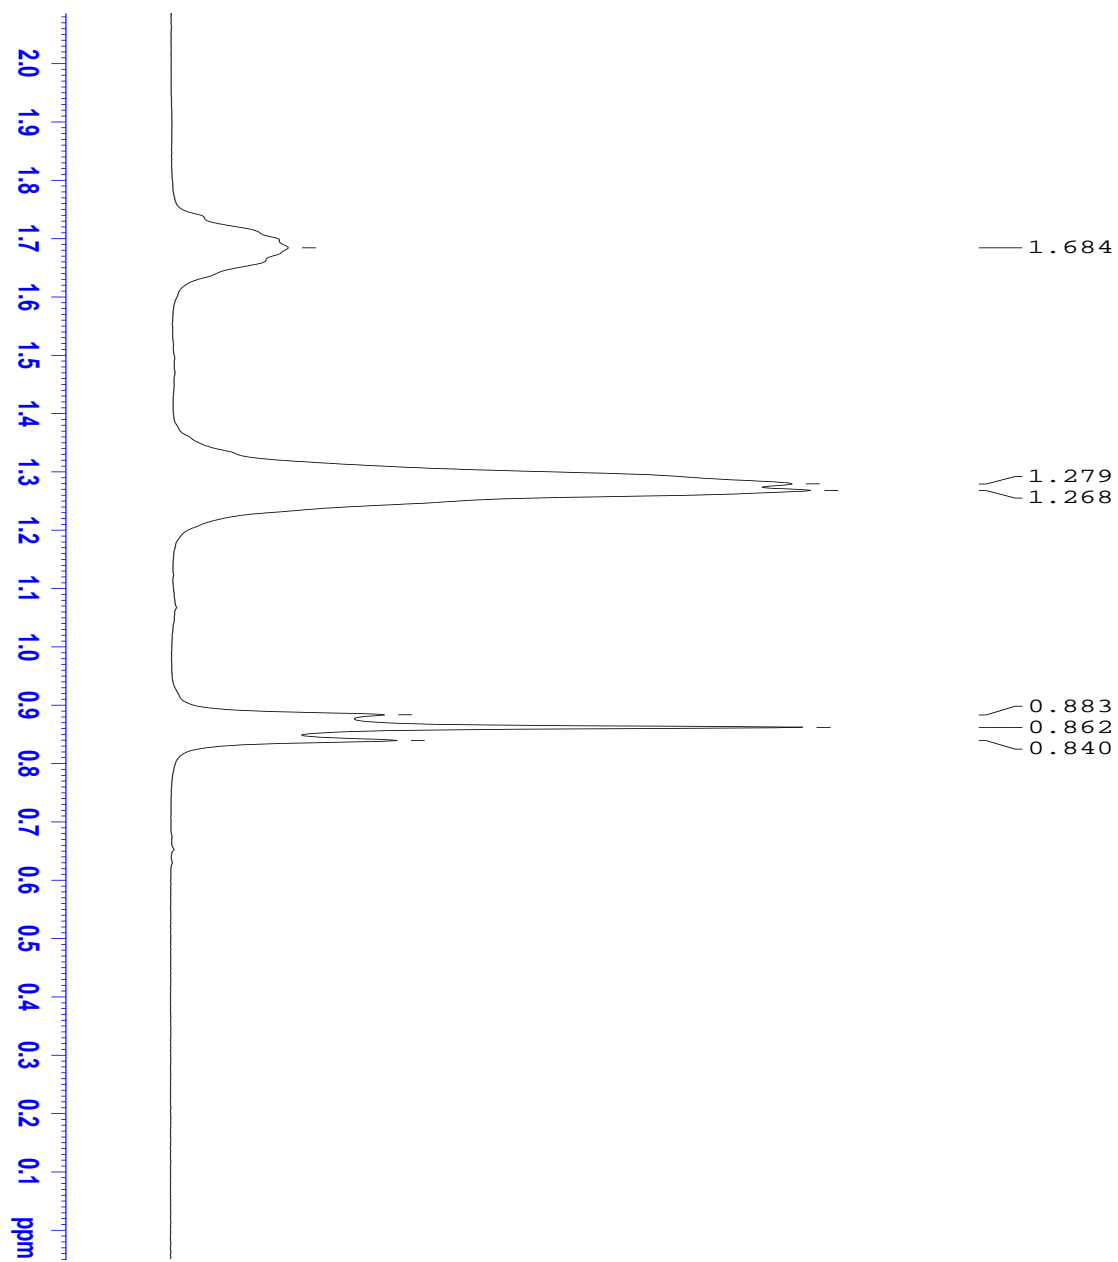

**Figure-S6a**

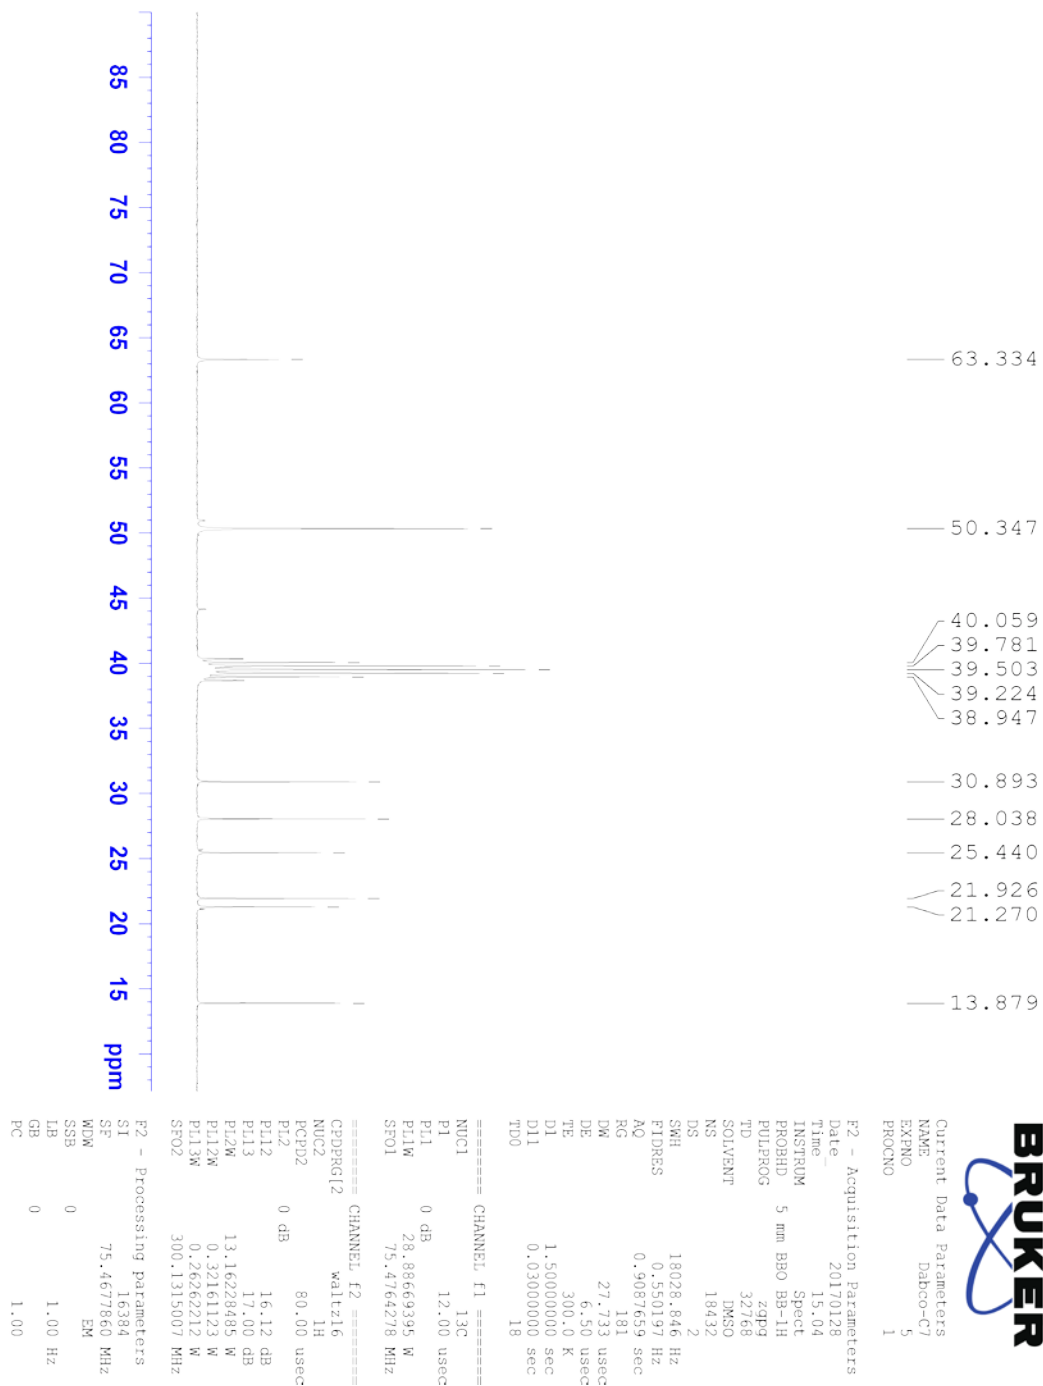

Figure-S7

SARFARAZ/DR.ABDUL HAMEED/SA-I-57/  
ICCBS,U.O.K/

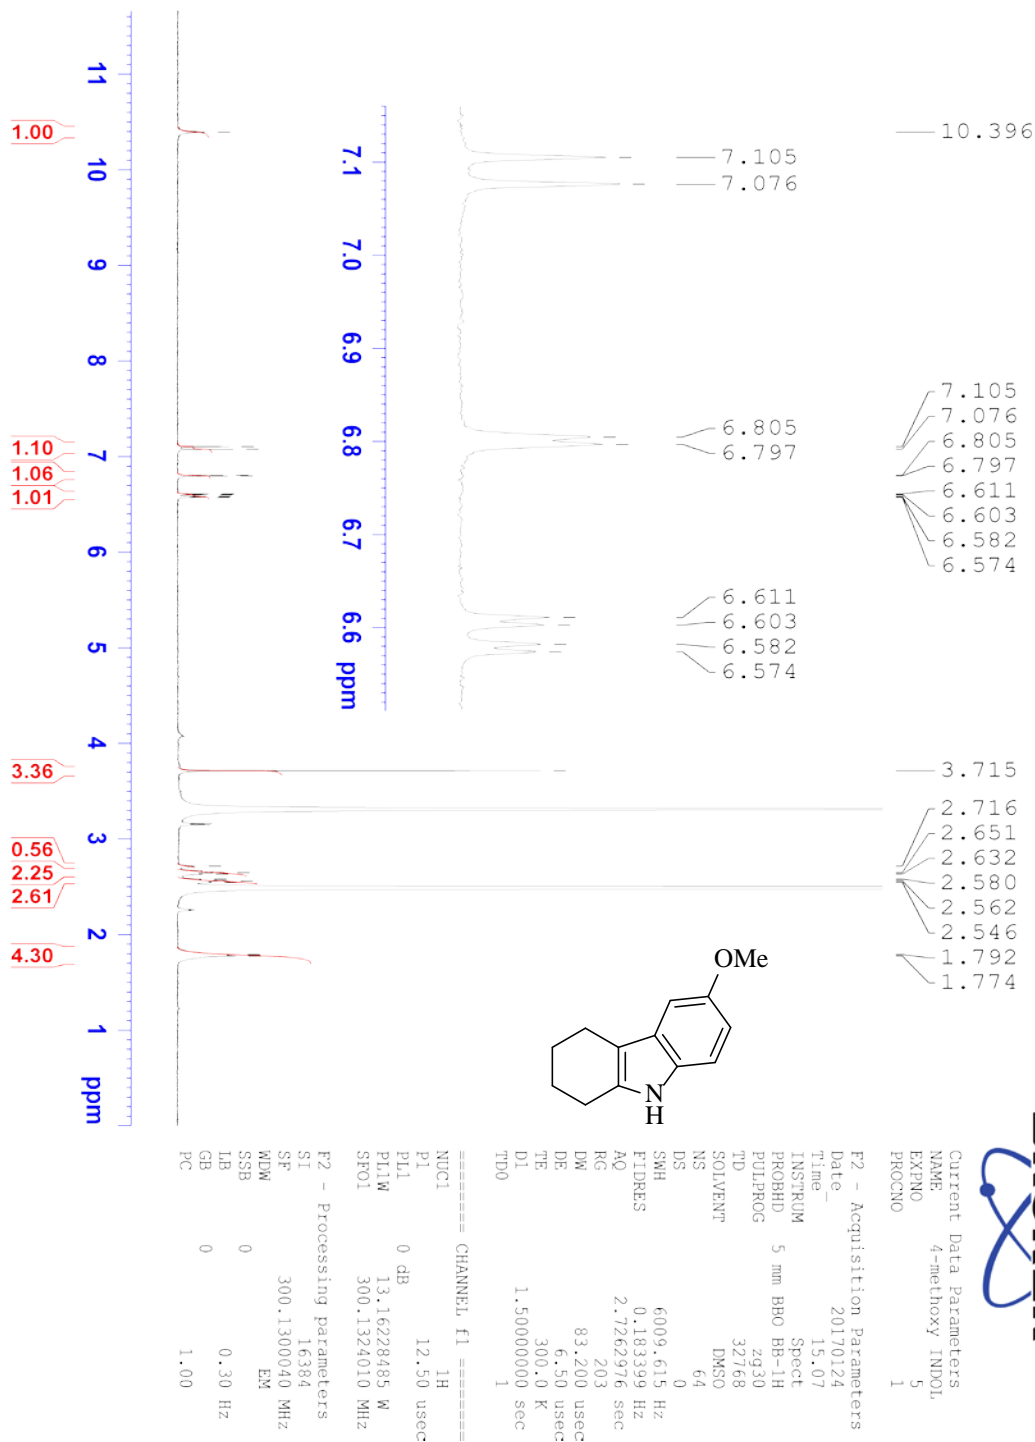

Figure-S8

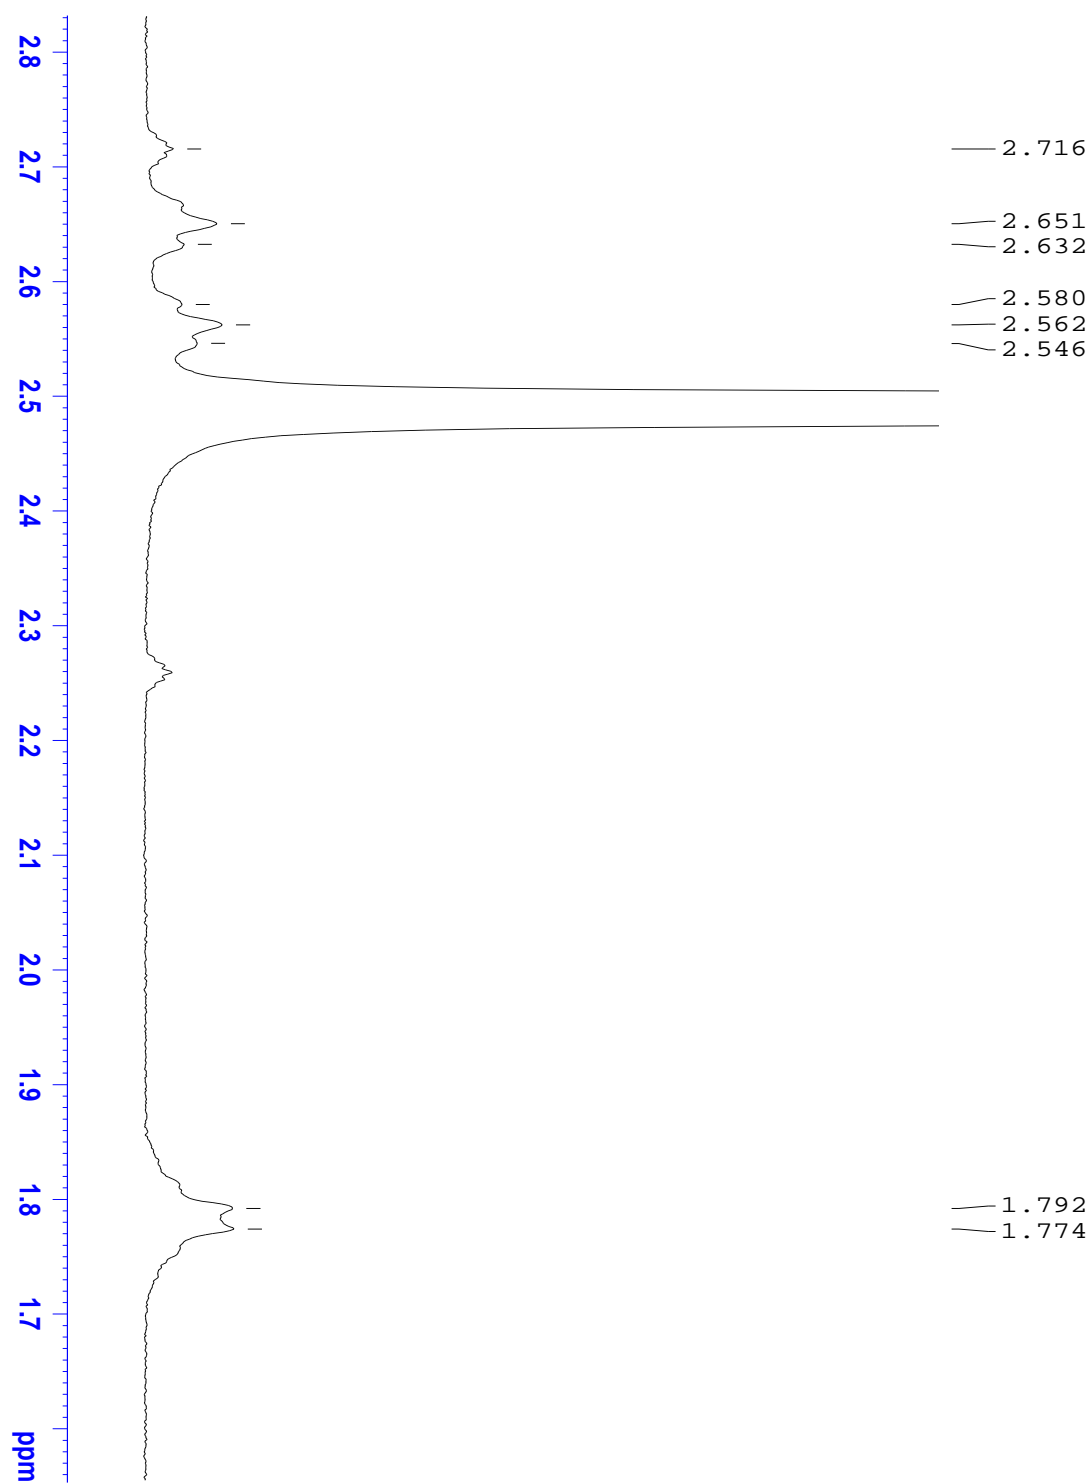

**Figure-S8a**

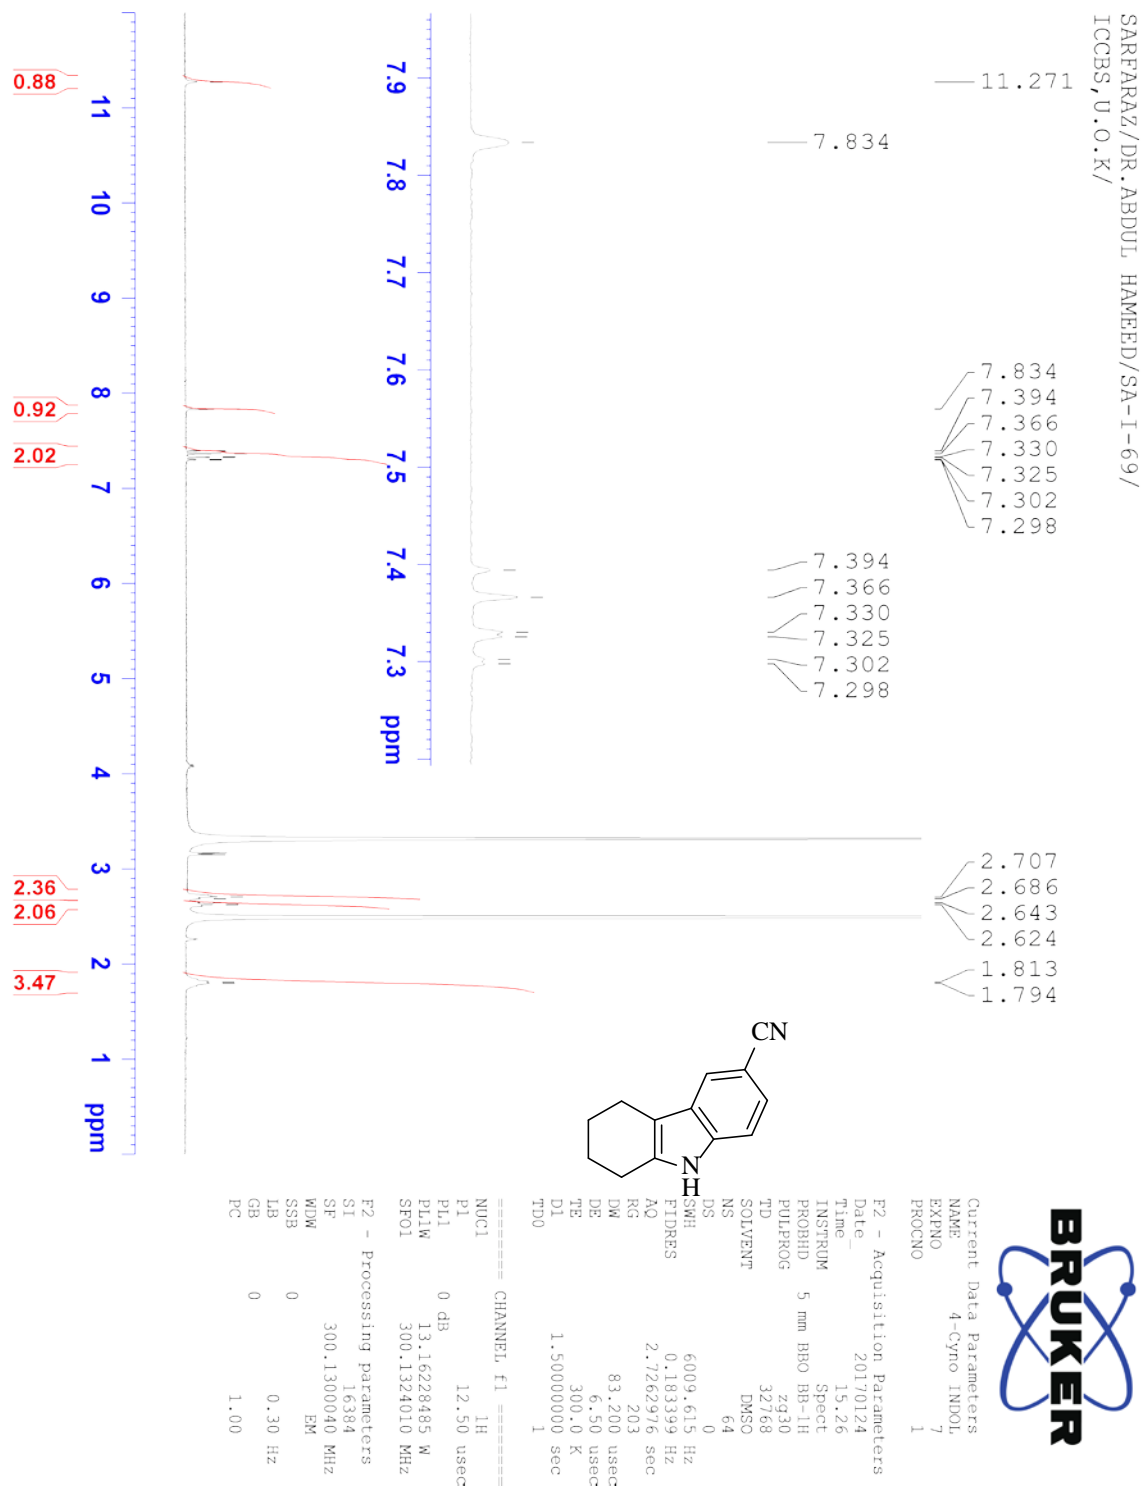

Figure-S9

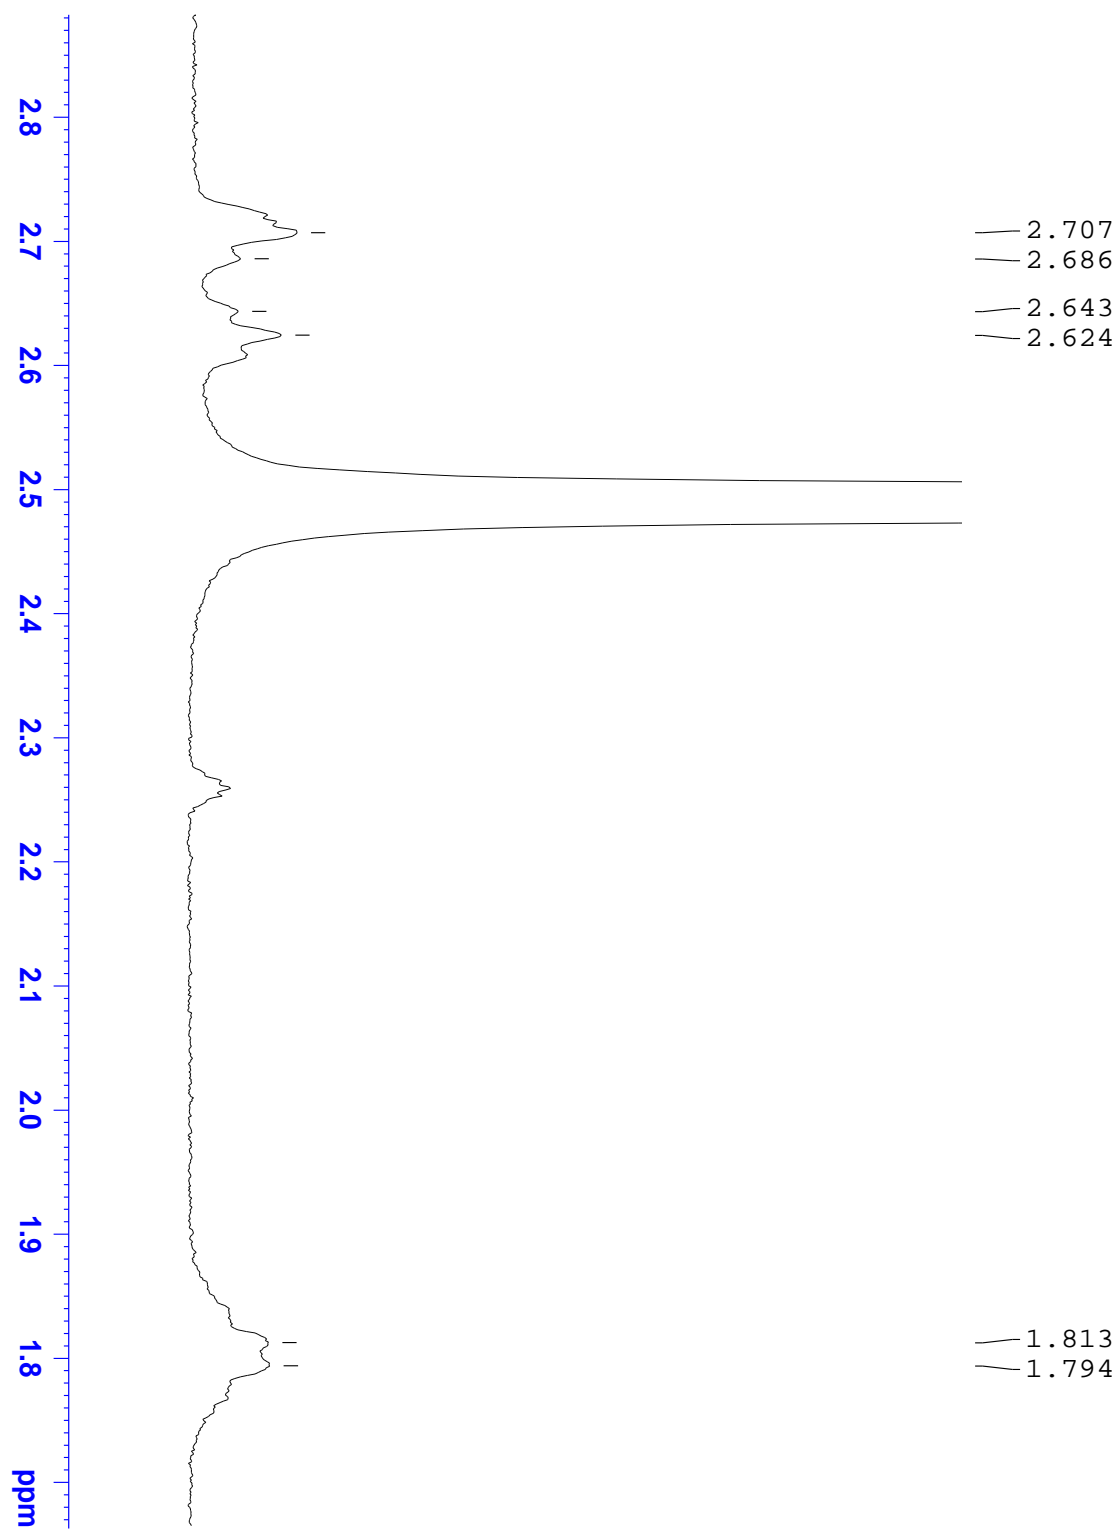

**Figure-S9a**



SARFARAZ/DR.ABDUL HAMEED/SA-I-66/  
ICCBS,U.O.K/

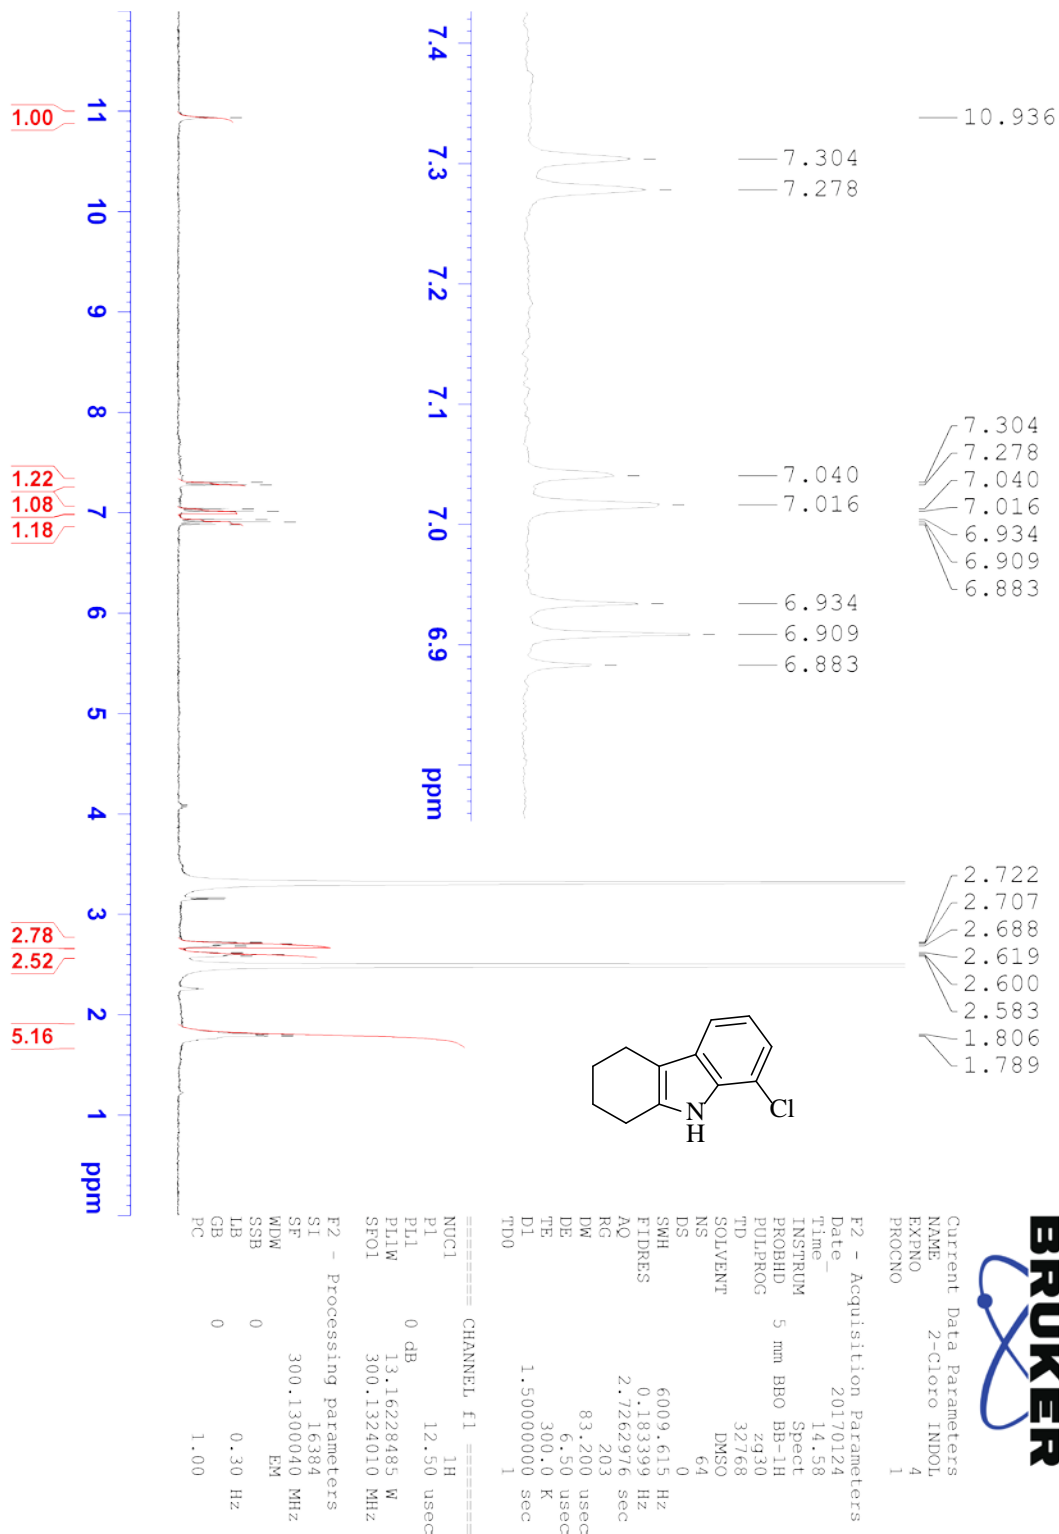

Figure-S10

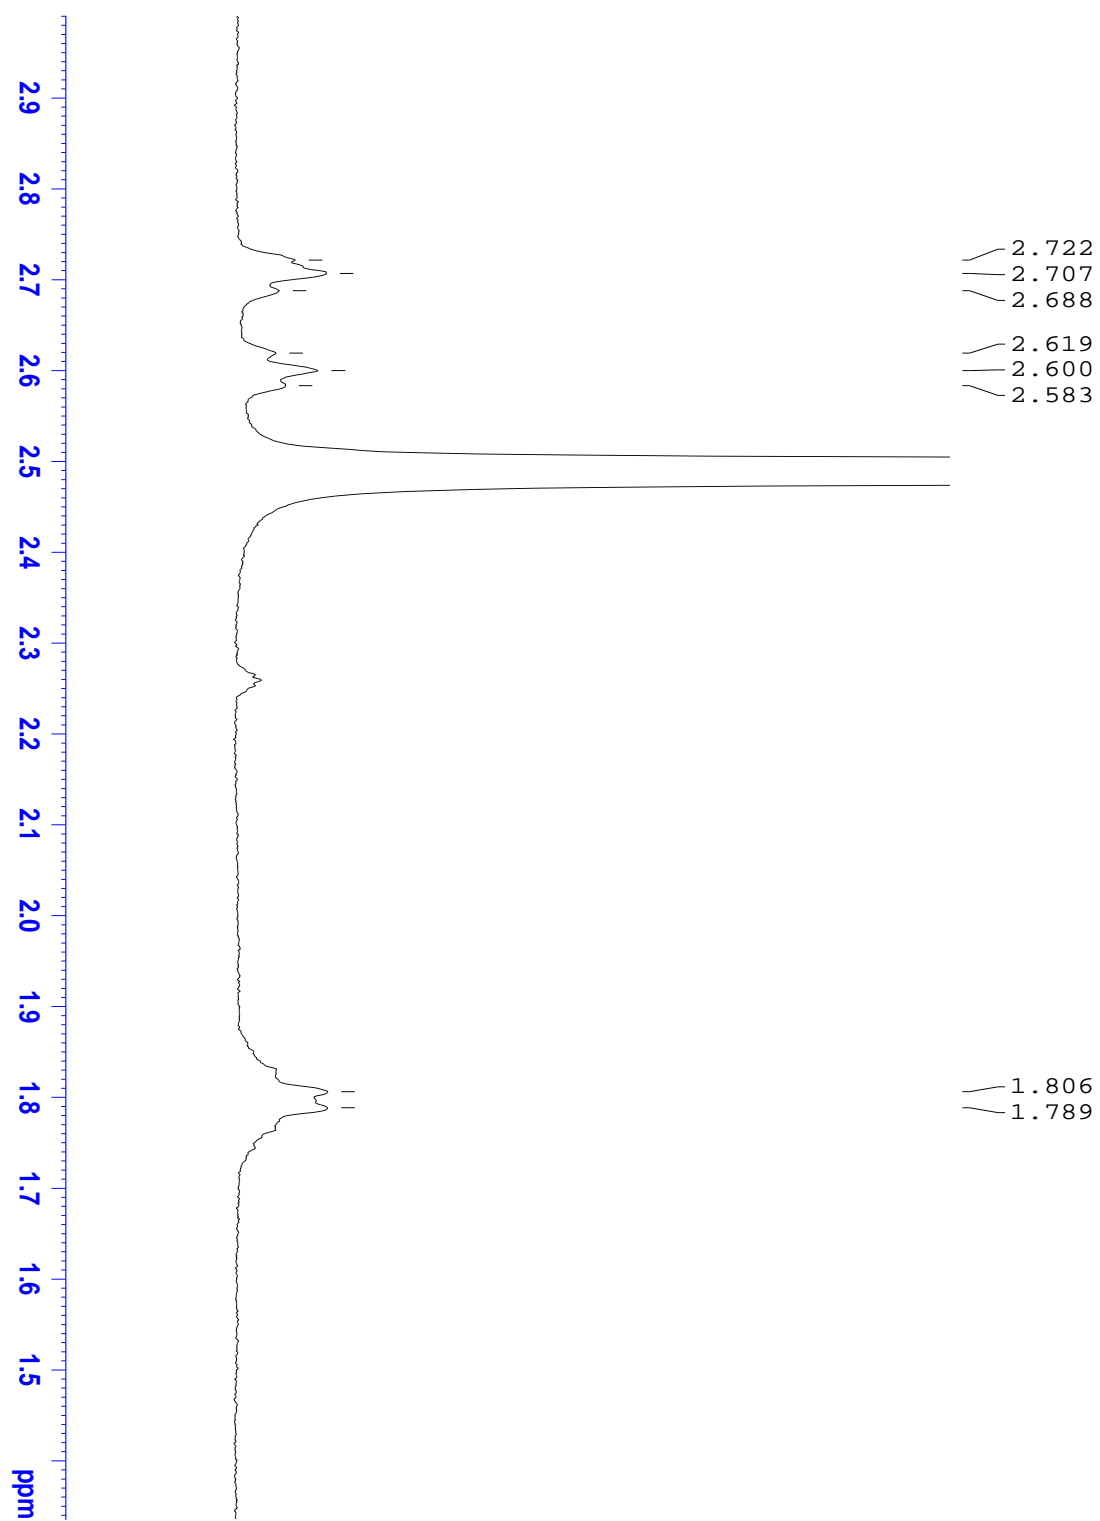

Figure-S10a

SARFARAZ/DR, ABDUL HAMEED/SA-I-85/  
ICCBS, U.O.K/

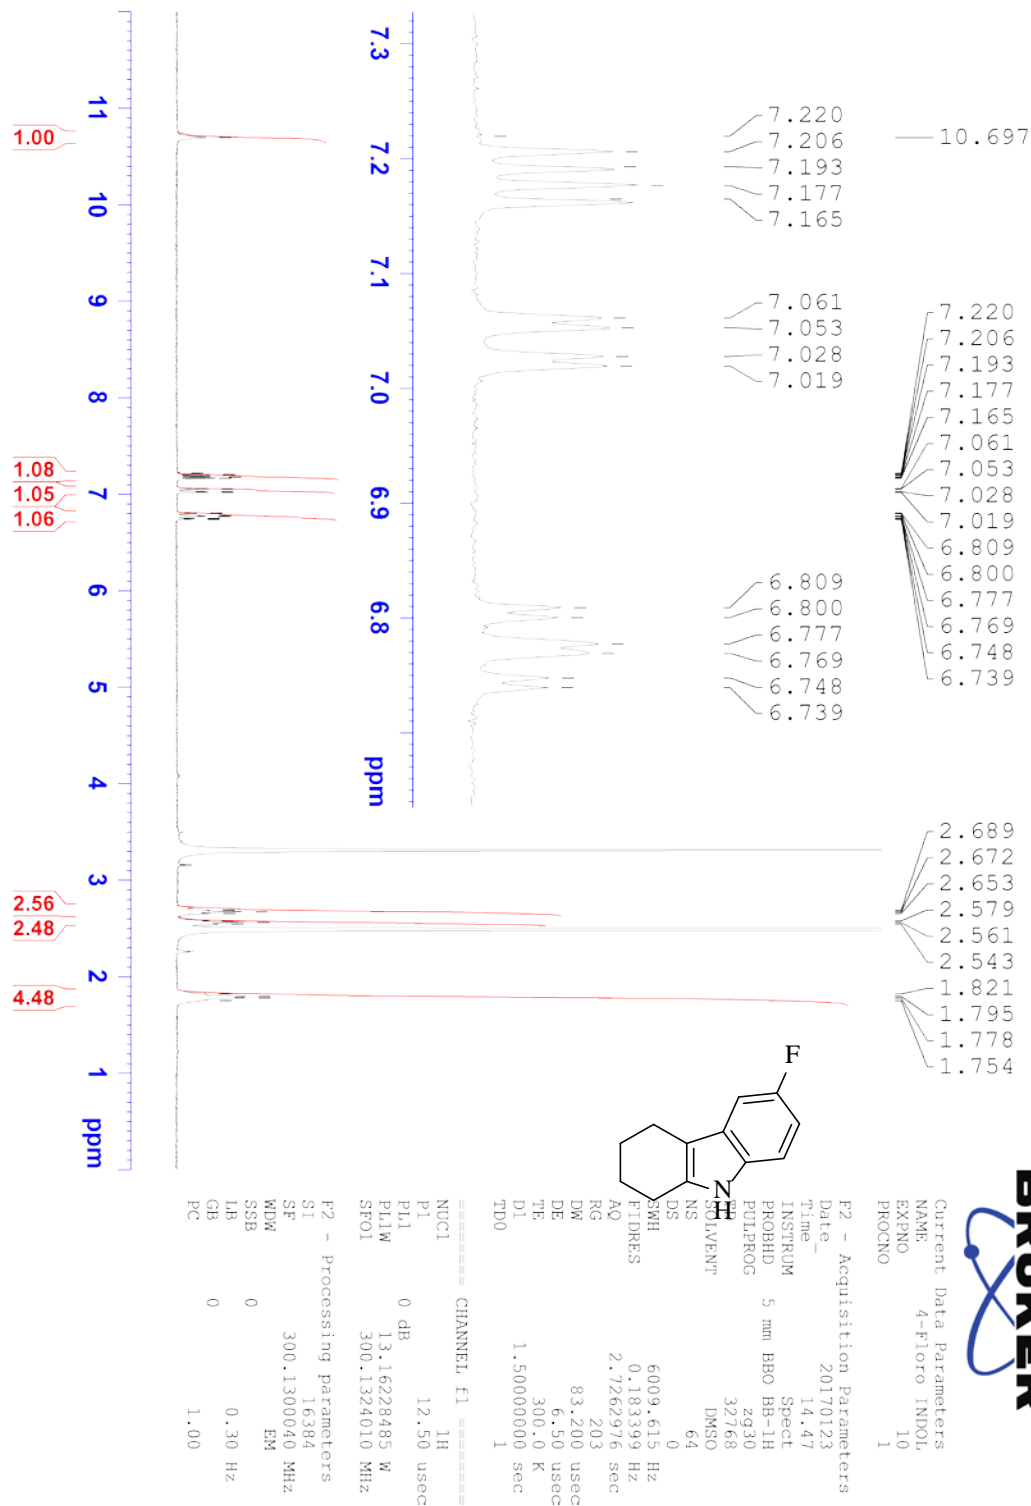

Figure-S11

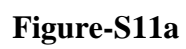

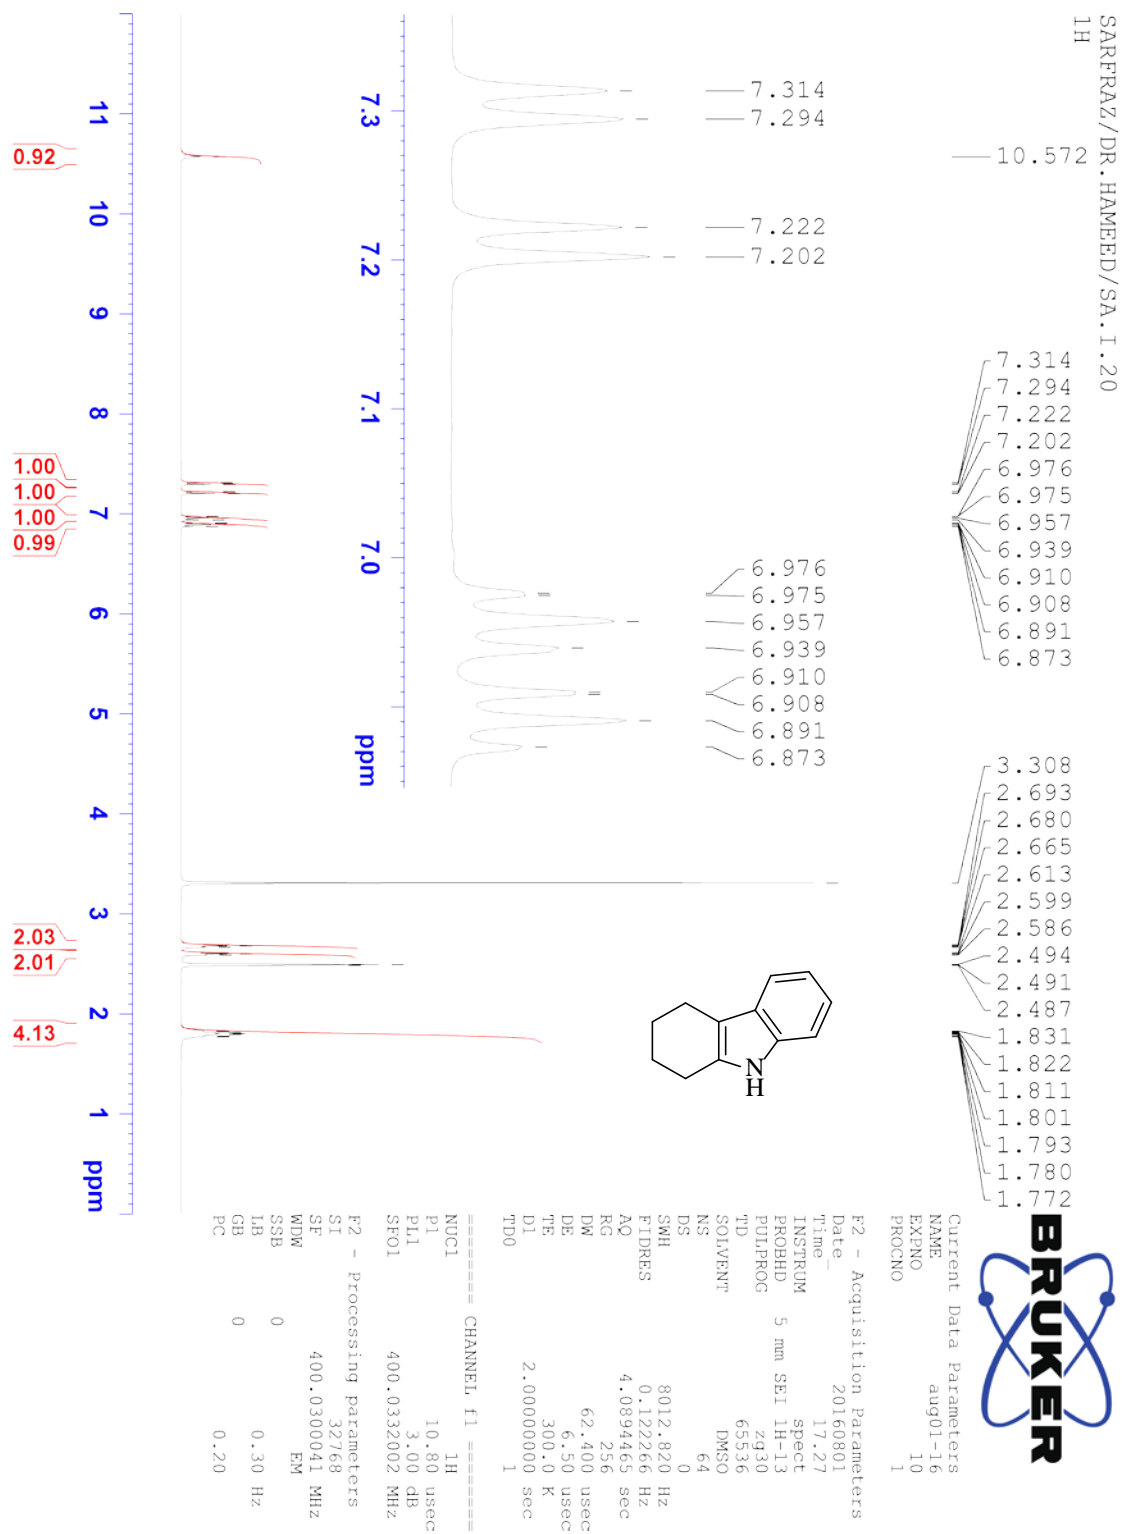

Figure-S12

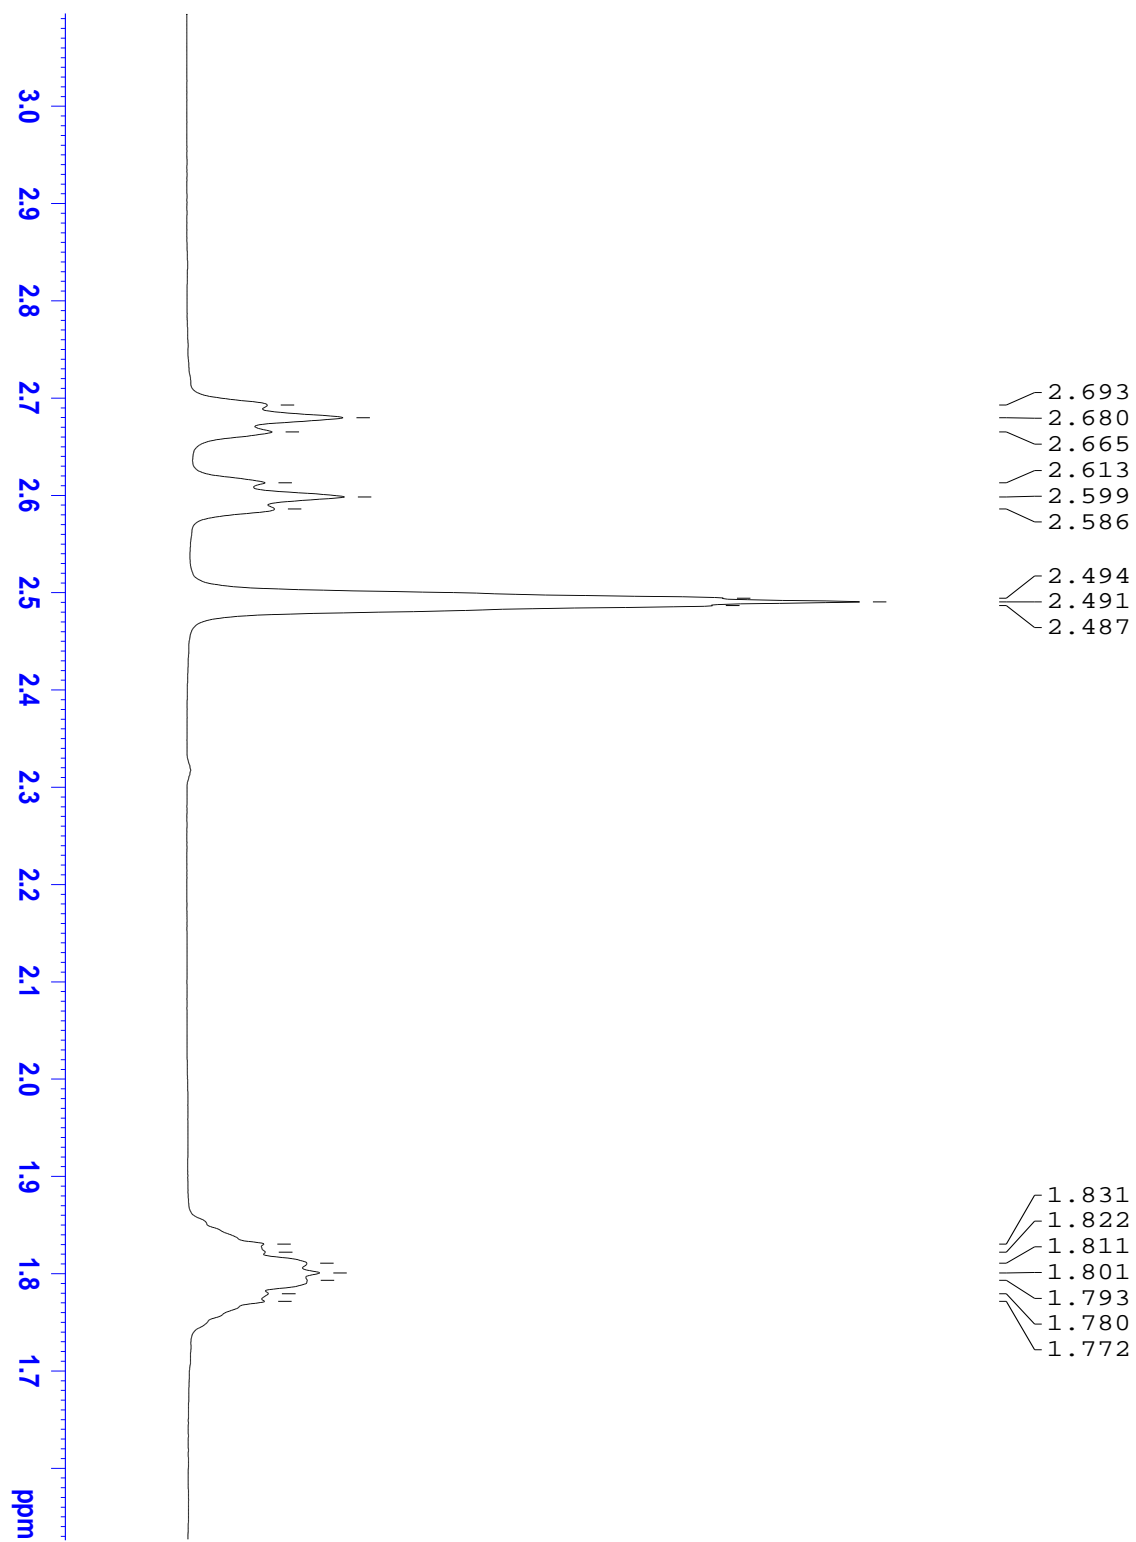

Figure-S12a

SARFARAZ/DR, ABDUL HAMEED/SA-I-97A/  
ICCBS, U.O.K/

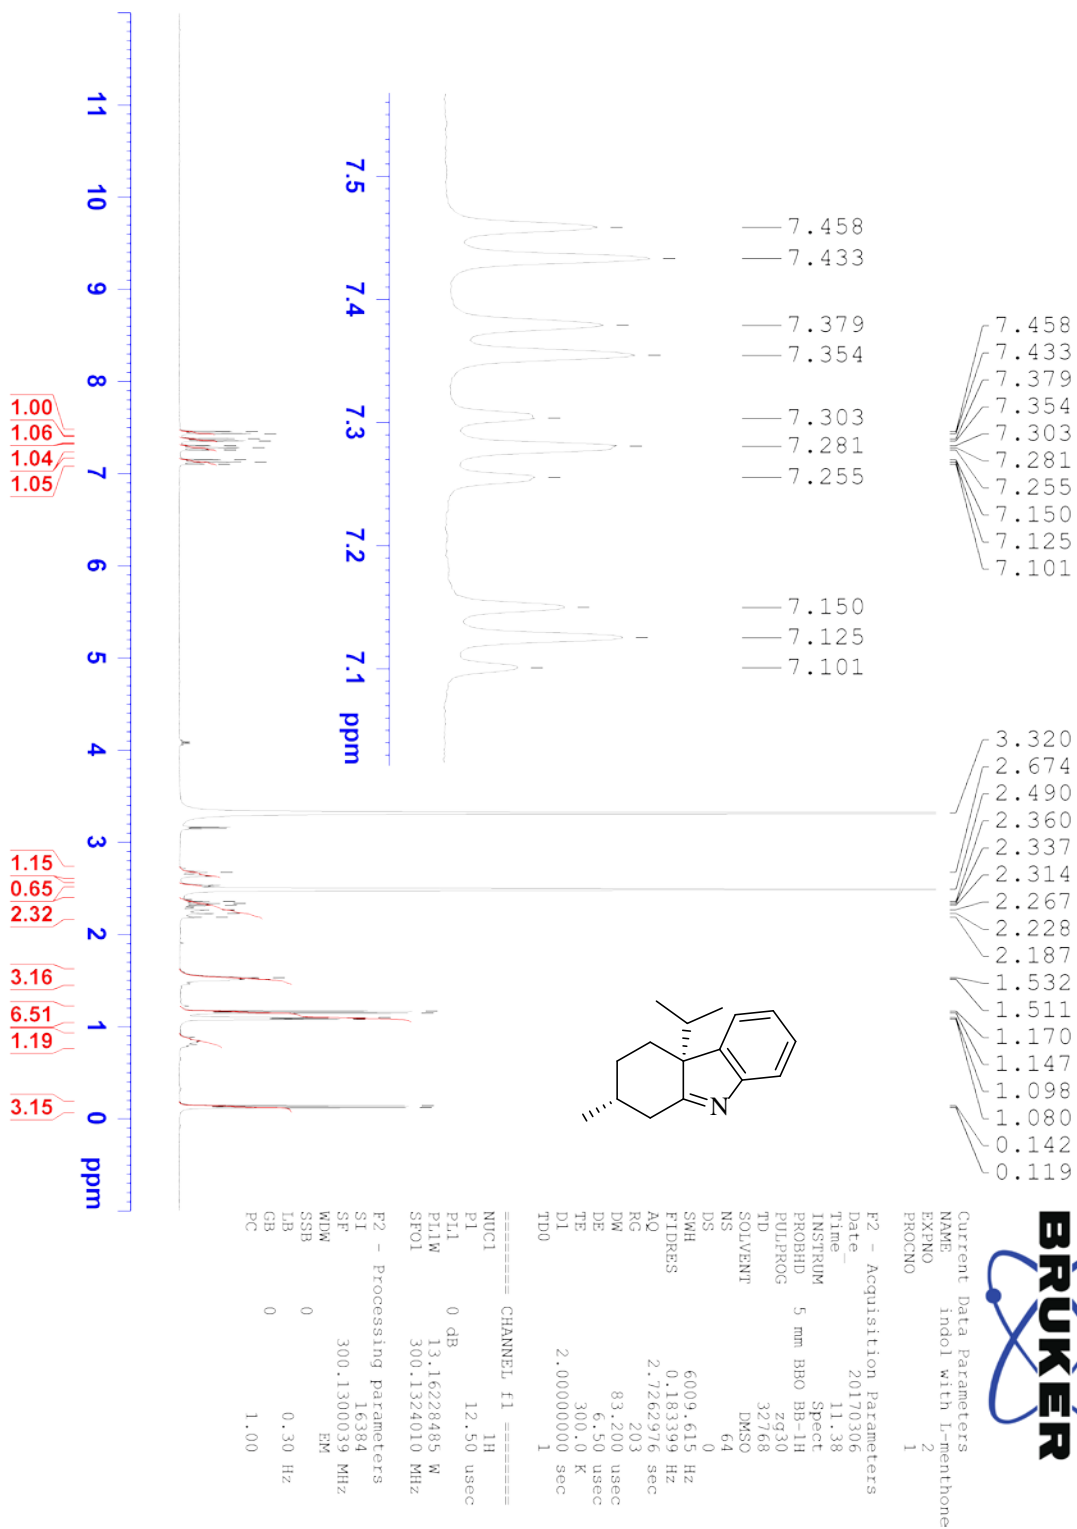

Figure-S13

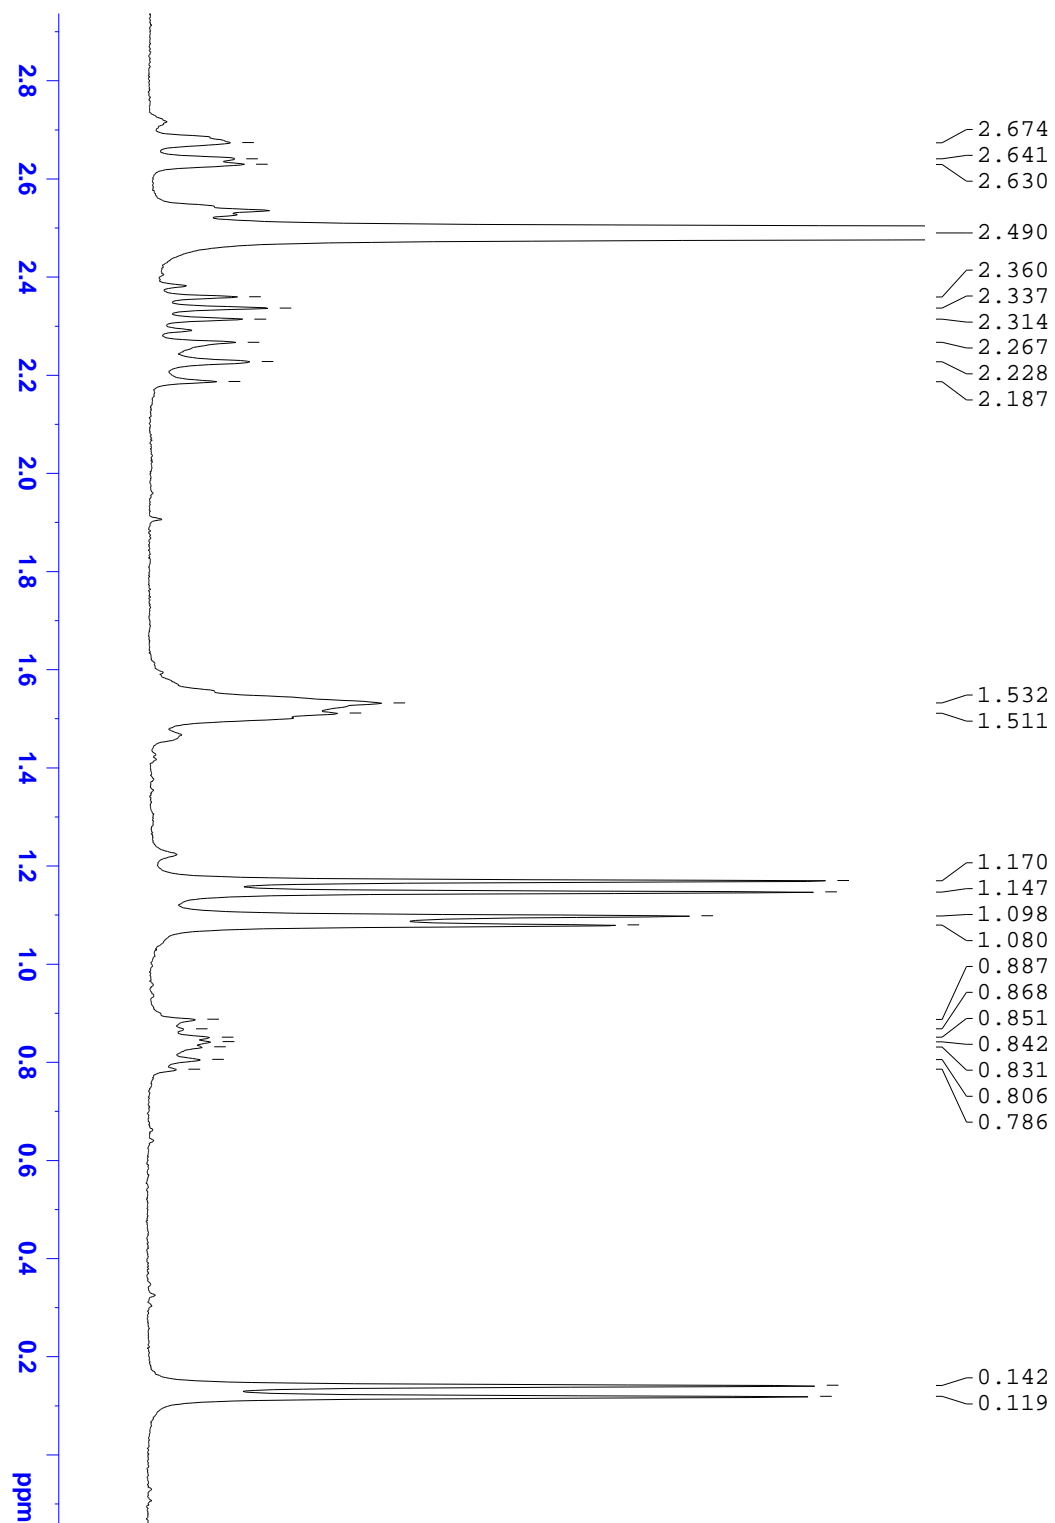

Figure-S13a



SARFARAZ/DR, ABDUL HAMEED/SA-I-97B/  
ICCS, U.O.K/

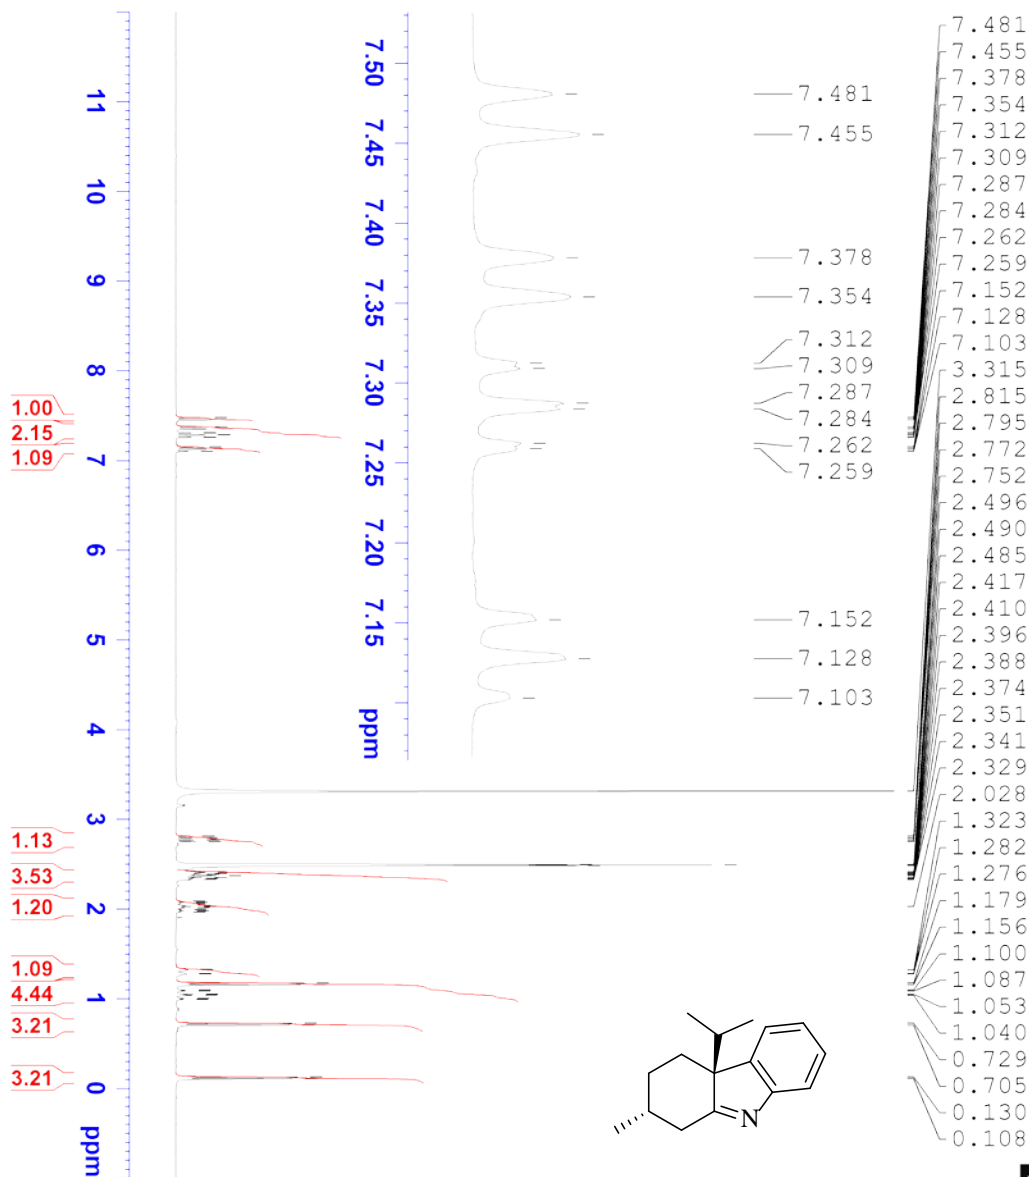

**BRUKER**

Current Data Parameters  
NAME indol with l-menthone  
EXPNO 5  
PROCNO 1

F2 - Acquisition Parameters  
Date\_ 20170306  
Time\_ 11.49  
INSTRUM Spect  
PROBHD 5 mm BBO BB-1H  
PULPROG zg30  
TD 32768  
SOLVENT DMSO  
NS 64  
DS 0  
SWH 6009.615 Hz  
FIDRES 0.183399 Hz  
AQ 2.7262976 sec  
RG 203  
DW 83.200 usec  
DE 6.50 usec  
TE 300.0 K  
D1 2.00000000 sec  
TD0 1

===== CHANNEL f1 =====  
NUC1 1H  
P1 12.50 usec  
PL1 0 dB  
PL1W 13.16228485 W  
SFO1 300.1324010 MHz

F2 - Processing parameters  
SI 16384  
SF 300.1300039 MHz  
WDW EM  
SSB 0  
LB 0.30 Hz  
GB 0  
PC 1.00

Figure-S14

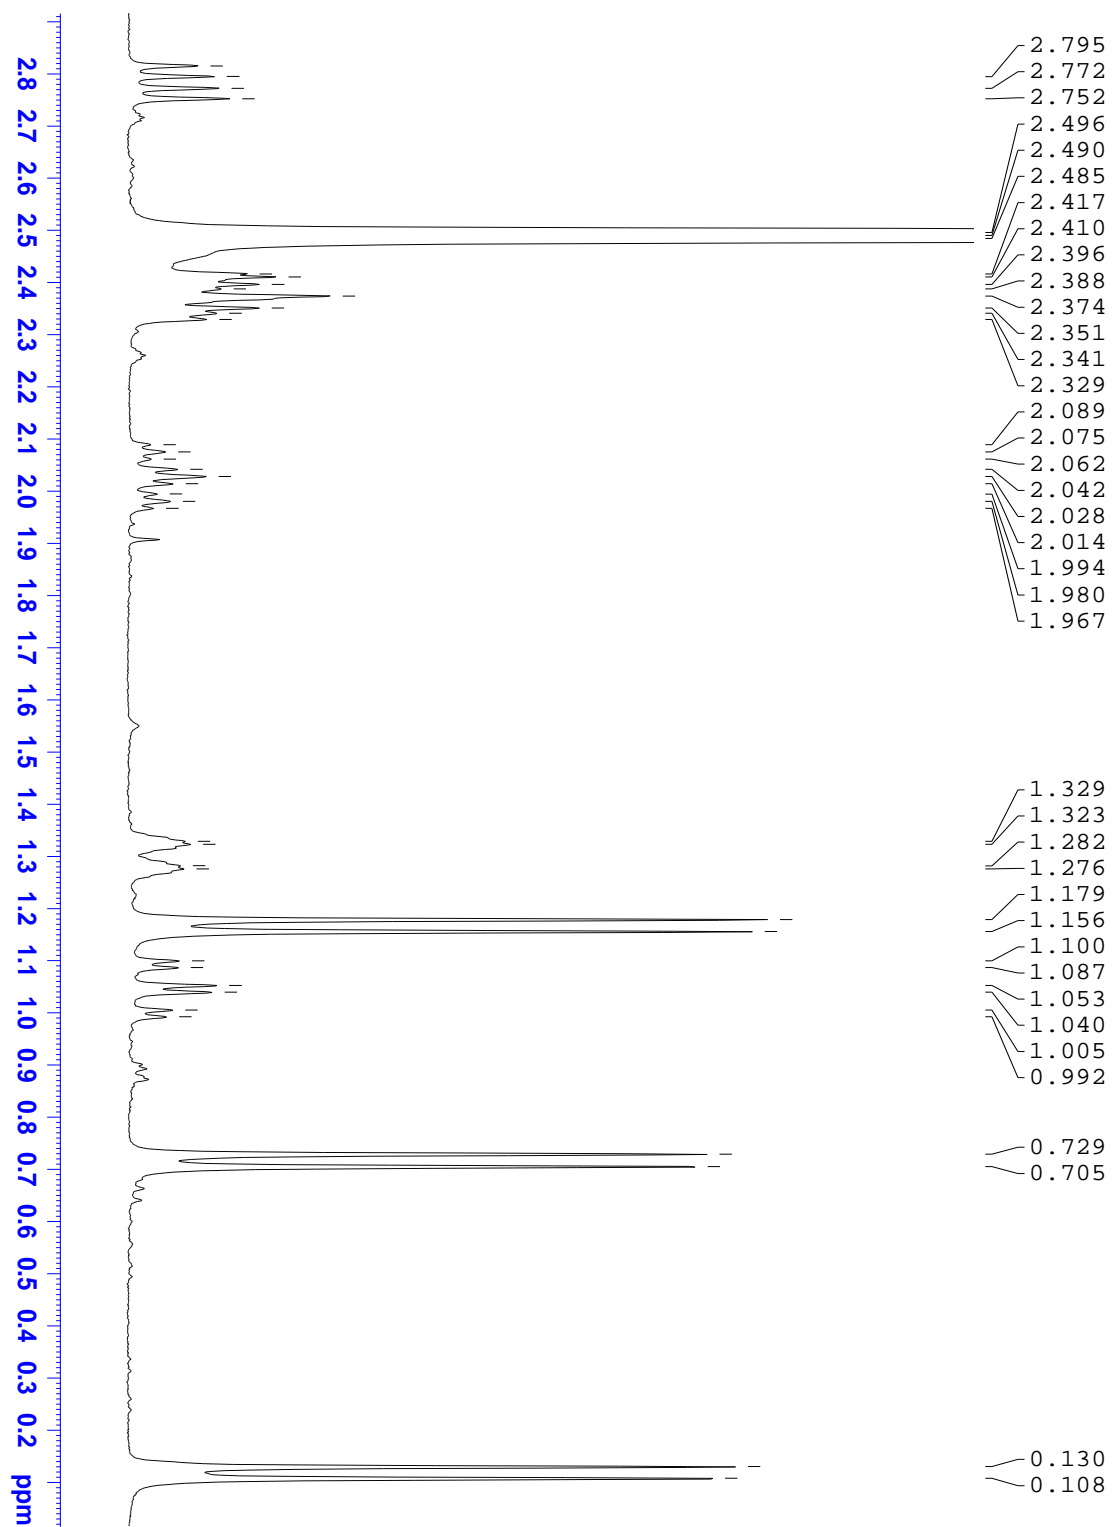

Figure-S14a

SARFARAZ/DR, ABDUL HAMEED/ SA-I-83  
<sup>1</sup>H

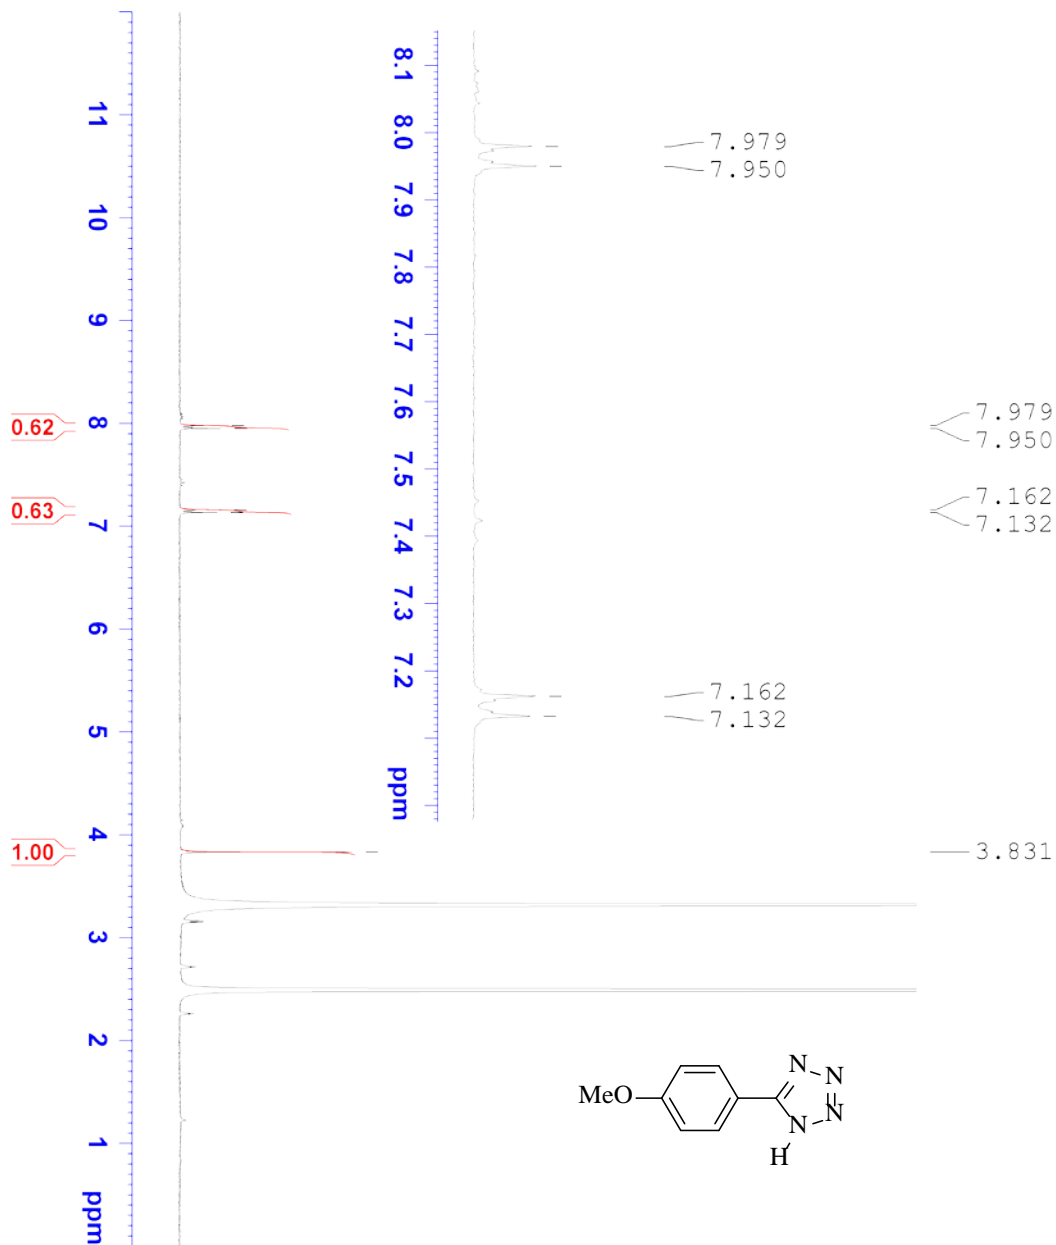

Current Data Parameters  
 NAME: 5-(4-methoxyphenyl)-1H-tetrazole  
 EXPTNO: 5  
 PROCNO: 1  
 P2 - Acquisition Parameters  
 Date\_: 20170131  
 Time: 10.45  
 INSTRUM: spect  
 PROBU: 5 mm BBO BB-1H  
 PULPROG: zgpg30  
 TO: 32768  
 SOLVENT: DMSO  
 NS: 64  
 DS: 0  
 SWH: 6009.413 Hz  
 F2: 500.136074 MHz  
 AQ: 2.7262976 sec  
 RG: 203  
 DW: 83.200 usec  
 DE: 6.50 usec  
 TE: 300.0 K  
 D1: 2.00000000 sec  
 T100: 1  
 CHANNEL f1  
 NUC1: <sup>1</sup>H  
 P1: 12.50 usec  
 PL1: 0 dB  
 F1A: 13.16228485 MHz  
 SFO1: 300.13624010 MHz  
 P2 - Processing parameters  
 SI: 32768  
 SF: 300.136074 MHz  
 DS: 4  
 SSB: 0  
 GB: 0  
 PC: 1.00

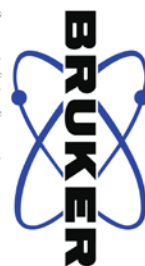

Figure-S15

SARFARAZ/DR, ABDUL HAMEED/SA-I-80/  
/1H

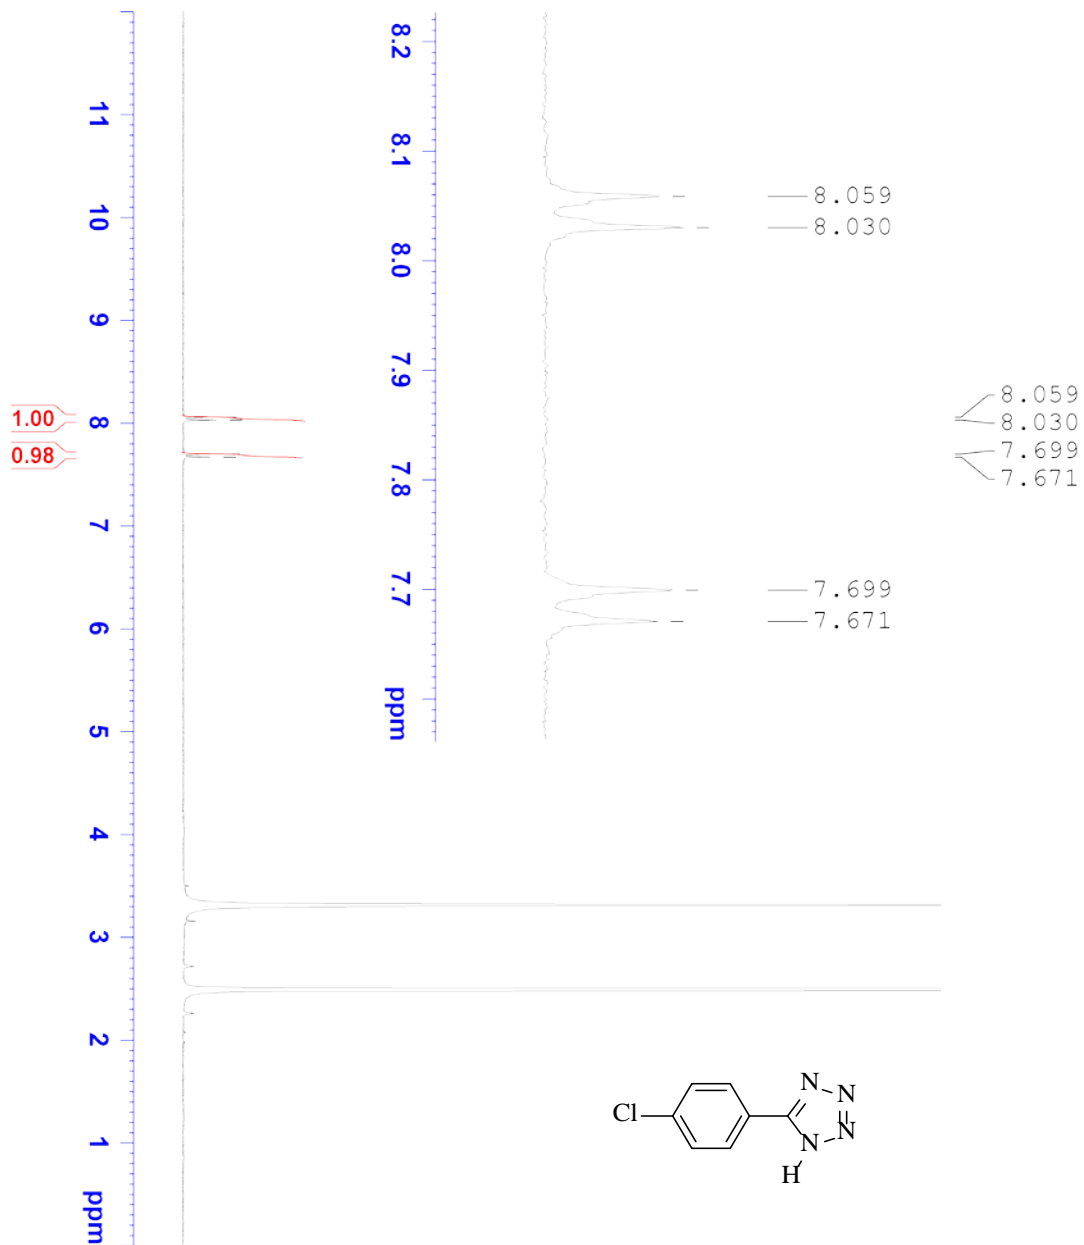

Current Data Parameters  
NAME 5-(4-chlorophenyl)-1H-tetrazole  
EXPNO 3  
PROCNO 1

F2 - Acquisition Parameters  
Date\_ 20170112  
Time 5:44  
INSTRUM spect  
PROBHD 5 mm BBO BB-1H  
PULPROG zg30  
TD 32768  
SOLVENT DMSO  
NS 64  
DS 0  
SS 0  
AQ 6009.613350 Hz  
ETDRES 0.181399 Hz  
RG 2.7262976 sec  
RG 203  
FWD 83.200 usec  
DE 6.50 usec  
TE 300.0 K  
D1 2.00000000 sec  
TD0 1

CHANNEL f1 1H  
NUC1 1H  
P1 12.50 usec  
PL1 0 dB  
PR1W 13.16228485 M  
SFO1 300.1324010 MHz

F2 - Processing parameters  
SI 16384  
SF 300.1300037 MHz  
WDW EM  
SSB 0  
GB 0  
PC 1.00

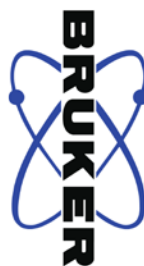

Figure-S16

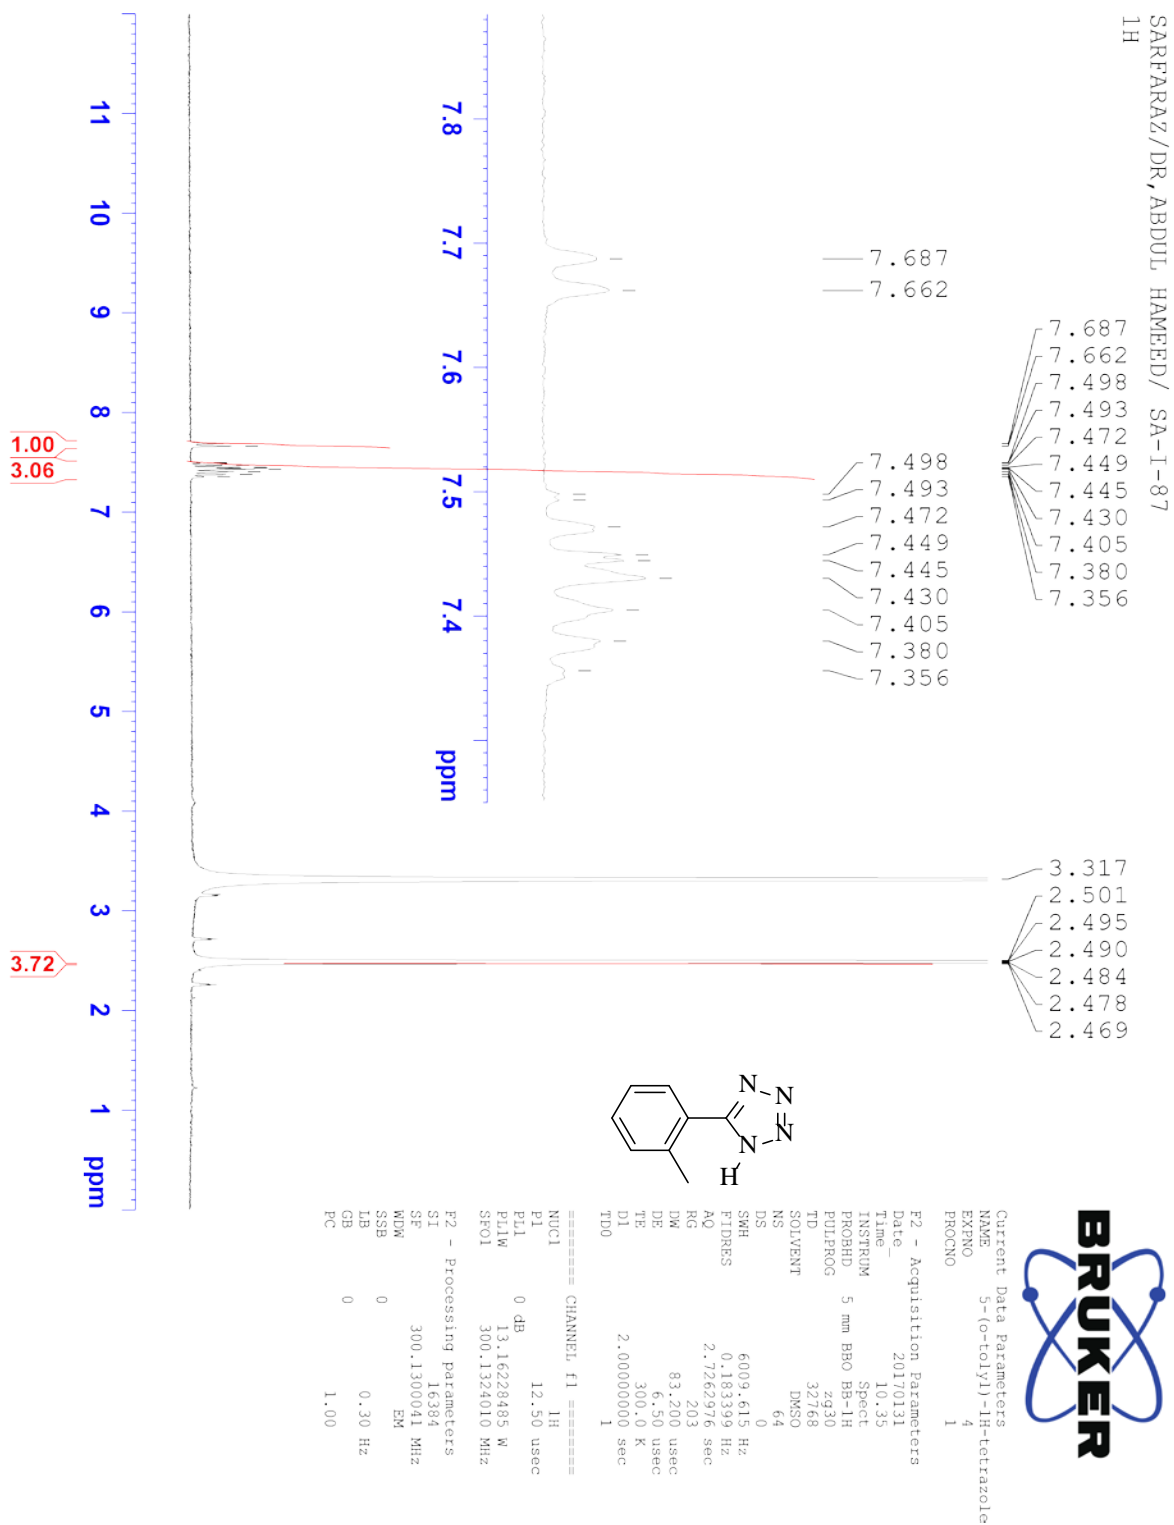

Figure-S17

SARFRAZ/DR.HAMEED/SI.I.82  
<sup>1</sup>H

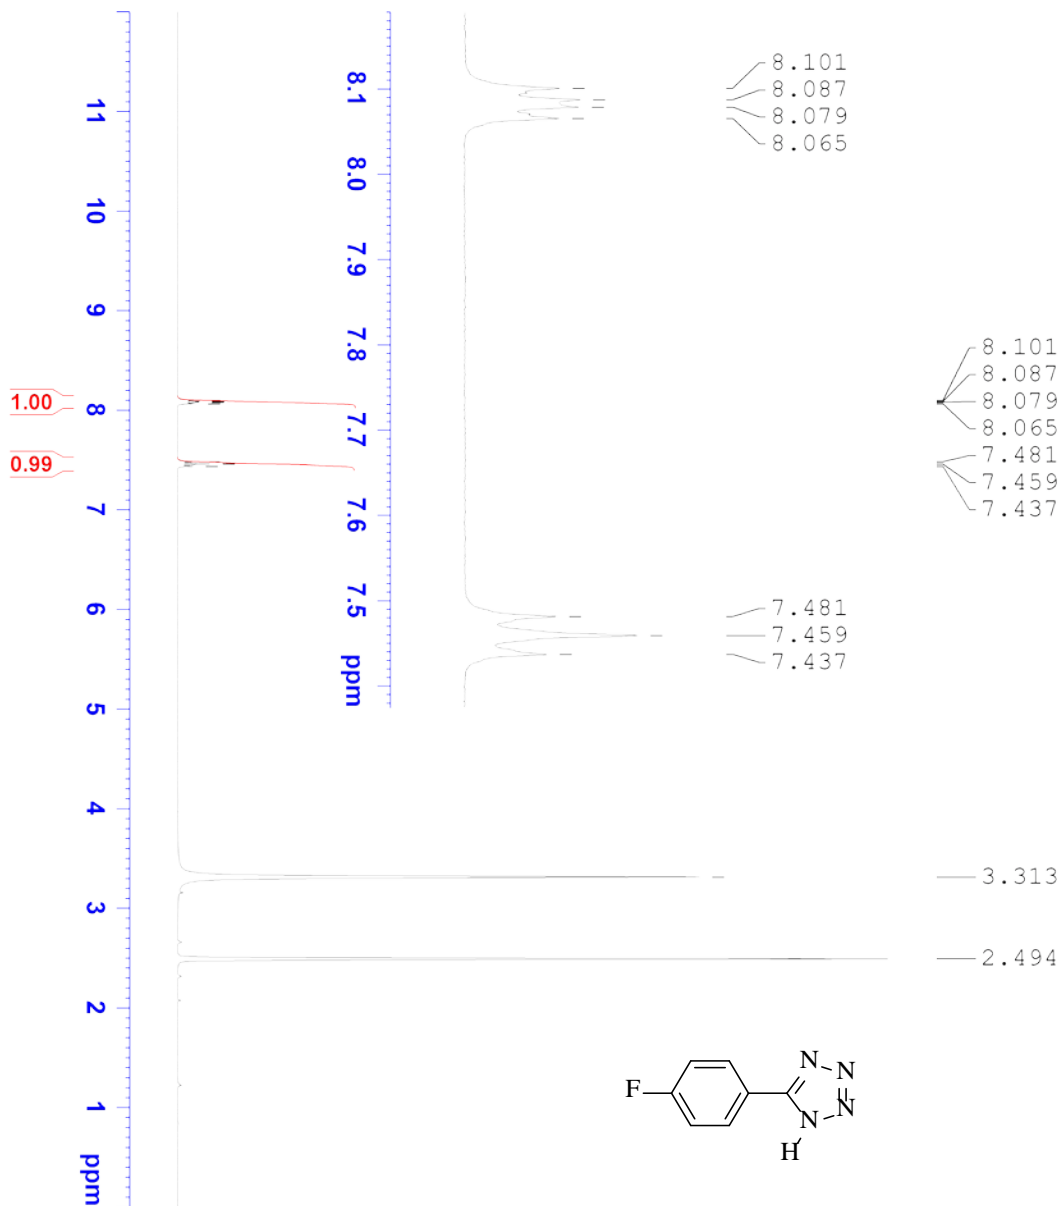

**BRUKER**

Current Data Parameters  
 NAME 5-(4-Fluorophenyl)-1H-tetrazole  
 EXPNO 3  
 PROCNO 1

F2 - Acquisition Parameters  
 Date\_ 20170113  
 Time\_ 17.58  
 INSTRUM spect  
 PULPROG zgpg30  
 TD 65536  
 SOLVENT DMSO  
 NS 64  
 DS 4  
 SWH 8012.800 Hz  
 FIDRES 0.122266 Hz  
 AQ 4.0894465 sec  
 RG 574.7  
 DW 62.400 usec  
 DE 6.50 usec  
 TE 300.2 K  
 D0 2.00000000 sec  
 TDO 1

CHANNEL f1  
 NUC1 <sup>1</sup>H  
 P1 10.00 usec  
 PL 3.00 dB  
 SFO1 400.032002 MHz

F2 - Processing parameters  
 SI 32768  
 SF 400.0100041 MHz  
 WF 0  
 WDS 0.30 Hz  
 GB 0  
 PC 1.00

Figure-S18

SARFARAZ/DR, ABDUL HAMEED/SA-I-86/  
ICCBS, U.O.K/

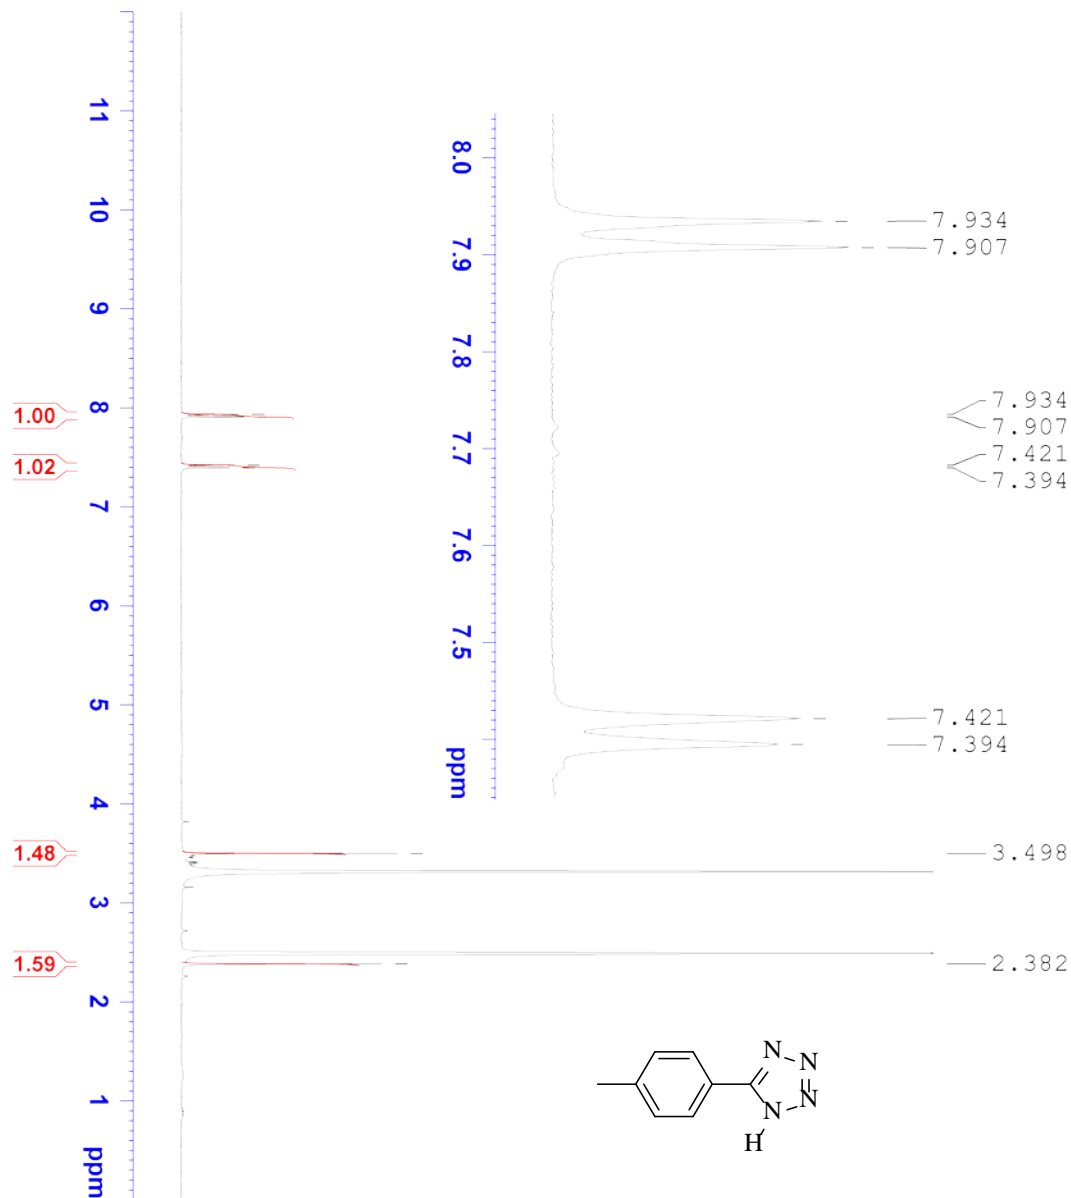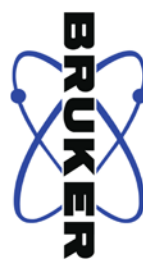

Current Data Parameters  
NAME 5-(p-tolyl)-1H-tetrazole  
EXPNO 11  
PROCNO 1

F2 - Acquisition Parameters

Date\_ 20170123  
Time 14.55  
INSTRUM Spect  
PROBHD 5 mm BBO BB-1H  
PULPROG zg30  
TD 32768  
SOLVENT DMSO  
NS 64  
DS 0  
SWH 6009.615 Hz  
FIDRES 0.193399 Hz  
AQ 2.7262976 sec  
RG 203  
DW 83.200 usec  
DE 6.50 usec  
TE 300.0 K  
D1 1.50000000 sec  
TD0 1

===== CHANNEL f1 =====

NUC1 1H  
P1 12.50 usec  
PL1 0 dB  
PL1W 13.16228485 W  
SFO1 300.1324010 MHz

F2 - Processing parameters

SI 16384  
SF 300.1300040 MHz  
WDW EM  
SSB 0  
LB 0.30 Hz  
GB 0  
PC 1.00

Figure-S19

SARFRAZ/DR.HAMEED/SI.I.81  
<sup>1</sup>H

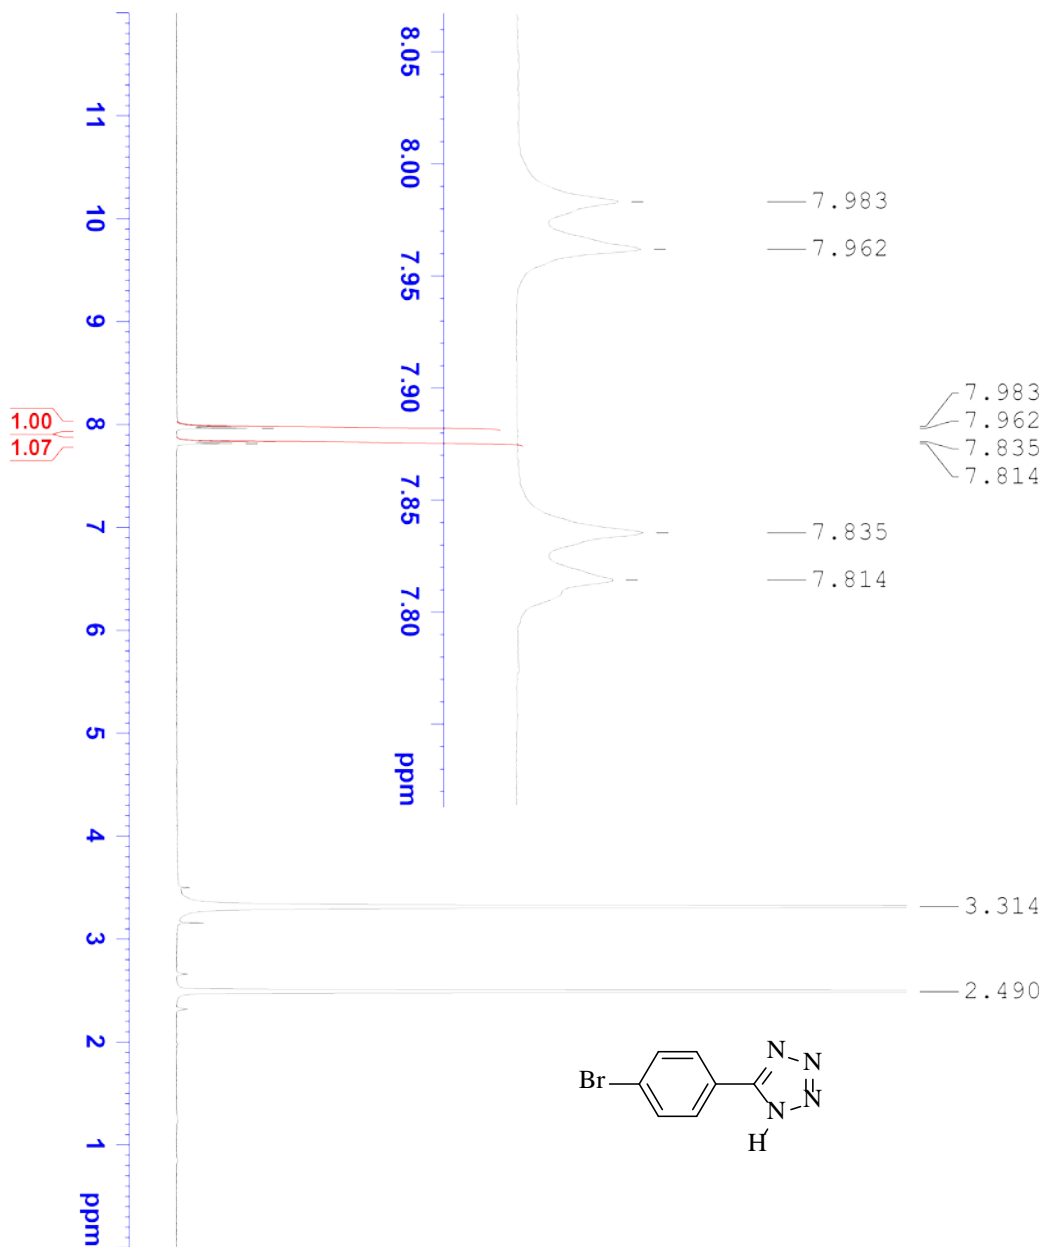

**BRUKER**

Current Data Parameters  
 NAME 5-(4-bromophenyl)-1H-tetrazole  
 EXPNO 4  
 PROCNO 1

F2 - Acquisition Parameters  
 Date\_ 20170113  
 Time 18.10  
 INSTRUM spect  
 PROBRD 5 mm SSI 1H-13  
 PULPROG zgpg30  
 TD 65536  
 SFO1 400.132002 MHz  
 FIDRES 0.122266 Hz  
 AQ 4.0894465 sec  
 RG 512  
 DM 62.410 usec  
 DE 1.450 usec  
 TE 300.0 K  
 D1 2.00000000 sec  
 TD0 1

===== CHANNEL f1 =====  
 NUC1 1H  
 P1 10.00 usec  
 PL1 3.00 dB  
 SFO1 400.032002 MHz

F2 - Processing parameters  
 SI 32768  
 SF 400.0100041 MHz  
 NH 256  
 SH 0  
 FWHM 0.30 Hz  
 LB 0  
 GB 0  
 PC 1.00

Figure-S20



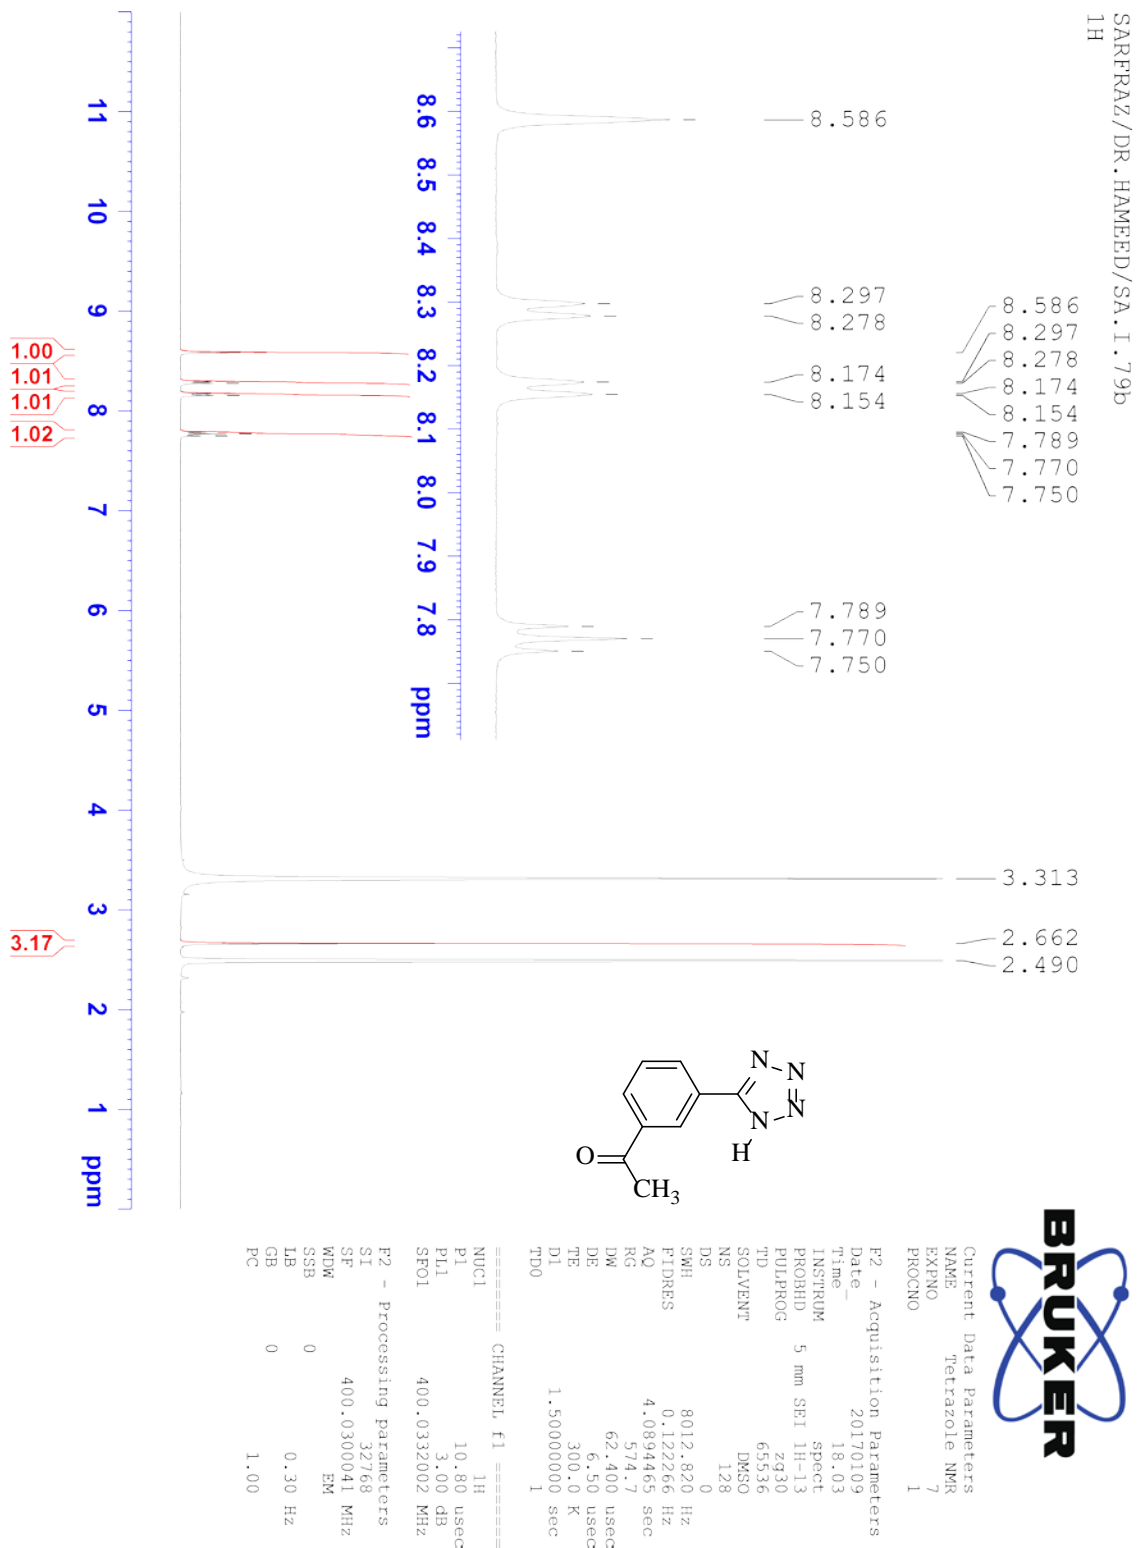

Figure-S21

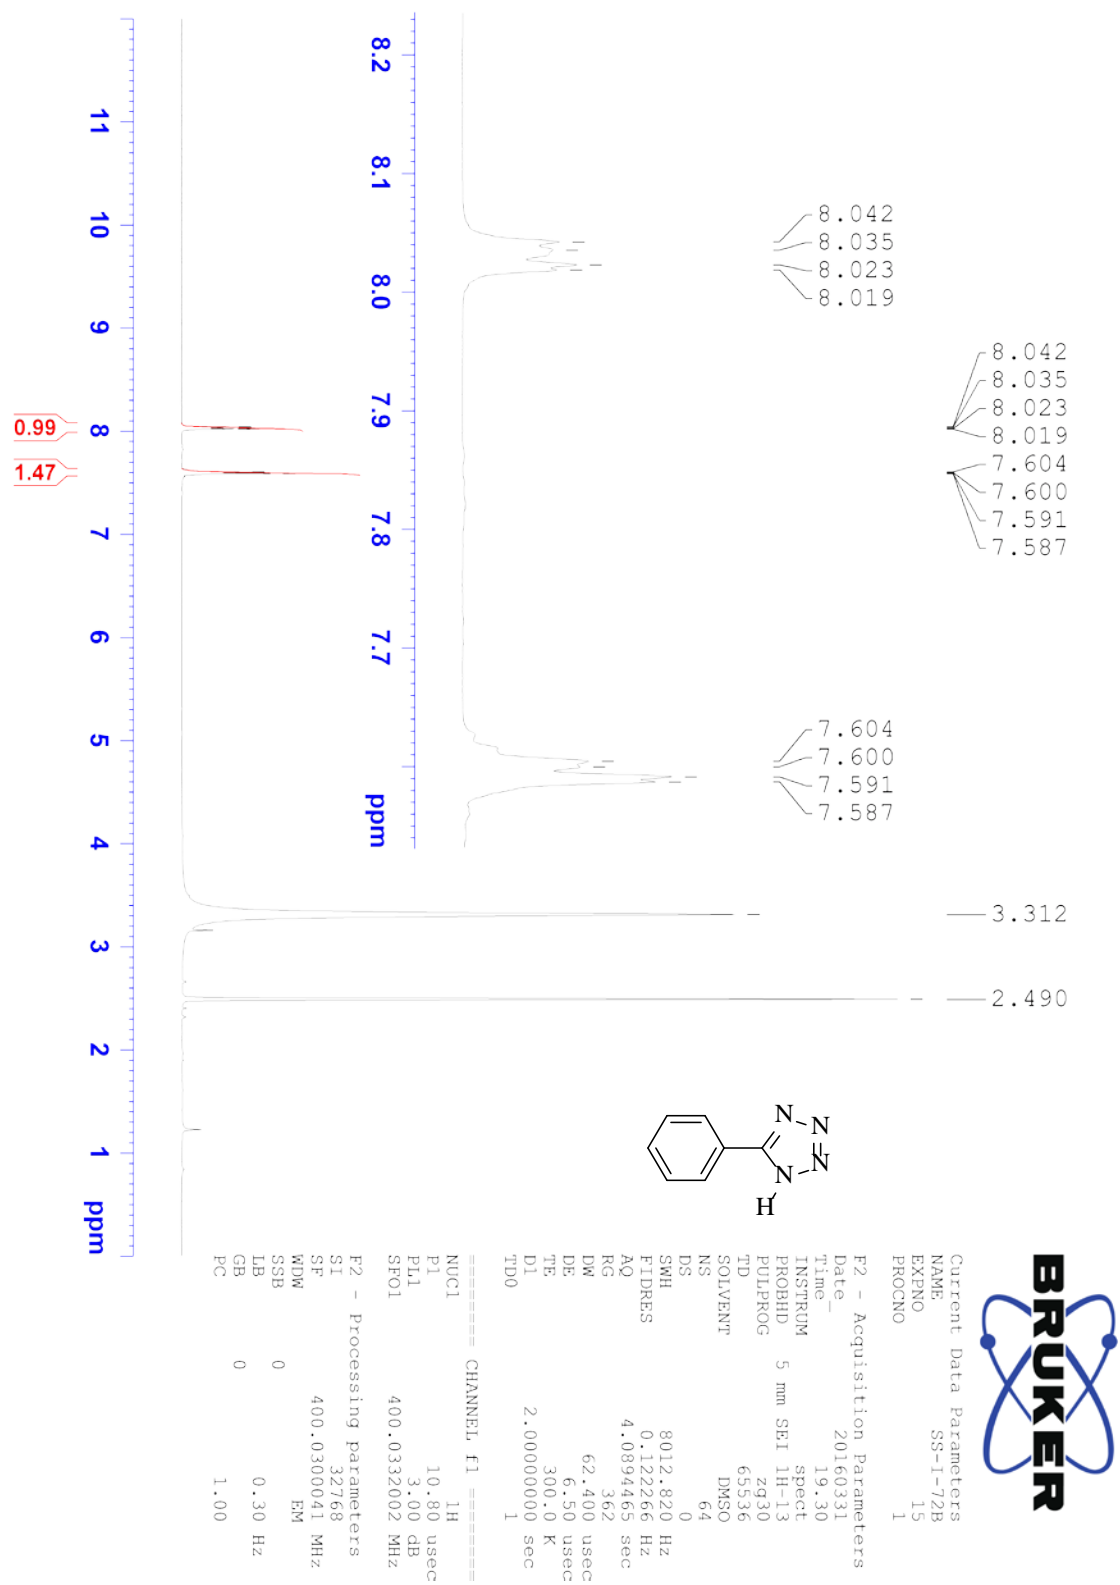

Figure-S22
